# Supplementary material
Source: publisher figshare collection journal article supplement (https://acs.figshare.com/ndownloader/files/4720402)

## Supporting Information

### Studies of Stereochemistry of [2+2]-Photocycloaddition Reactions of 2-Cyclohexenones with Olefins

Ruichao Shen and E. J. Corey

*Department of Chemistry and Chemical Biology, Harvard University*

*12 Oxford Street, Cambridge, Massachusetts 02138*

**General Procedures:** Unless stated otherwise, reactions were performed in flame-dried glassware under a positive pressure of nitrogen using freshly distilled dry solvents. NMR spectra were recorded on Varian Mercury-300 and Varian Mercury-400 instruments and calibrated using residual undeuterated solvent as an internal standard. The following abbreviations were used to explain the multiplicities: s = singlet, d = doublet, t = triplet, q = quartet, br = broad. IR spectra were recorded either on Thermo-Nicolet Avatar 360 FT-IR on a diamond crystal or Applied Systems (ASI) ReactIR 1000 spectrometers. Optical rotations were measured on Perkin-Elmer 241 polarimeter using Na lamp in a 1 mL cell having 1 decimeter length. Low-resolution and high-resolution mass spectral analyses were performed at the Harvard University Mass Spectrometry Center.

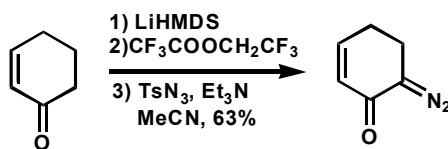

**6-Diazo-cyclohex-2-enone.** The compound was prepared by a modified Danheiser's protocol.<sup>1</sup> To a solution of hexamethyldisilazane (8.0 mL, 38.1 mmol) in THF (60 mL) at 0 °C was added 21 mL of *n*-BuLi (1.6 M in hexane). The resulting solution was stirred at 0 °C for 10 min, cooled to -78 °C, and treated dropwise with 2-cyclohexen-1-one (2.5 mL, 25.4 mmol). After stirring at -78 °C for 30 min, 2,2,2-trifluoroethyl trifluoroacetate (5.8 mL, 43 mmol) was added. The solution was stirred at -78 °C for 10 min, and poured into a mixture of 80 mL of Et<sub>2</sub>O and 80 mL of *aq.* 5% HCl. The aqueous layer was washed

<sup>1</sup> Danheiser, R. L.; Miller, R. F.; Brisbois, R. G.; Park, S. Z. *J. Org. Chem.* **1990**, 55, 1959.

with Et<sub>2</sub>O (40 mL × 2). The organic layers were combined, washed with brine, and concentrated at 1 atm at 67 °C until no more solvent condensed in the recovery flask. The crude solution was re-dissolved in 35 mL of MeCN and Et<sub>3</sub>N (4.3 mL, 30.9 mmol) and treated dropwise with a solution of TsN<sub>3</sub> (4870 mg, 24.7 mmol) in MeCN (15 mL) over 30 min. The reaction mixture was stirred for 30 min after addition, and concentrated *in vacuo*. Purification of the crude product on Et<sub>3</sub>N-buffered silica gel with hexane–EtOAc (4:1) provided 6-diazo-cyclohex-2-enone in 63% yield (1.95 g), which was used immediately for the next step reaction. <sup>1</sup>H NMR (400 MHz, CDCl<sub>3</sub>) δ 6.72 (1H, dt, *J* = 10.4, 4.4 Hz), 6.07 (1H, d, *J* = 10.4 Hz), 2.88 (2H, t, *J* = 6.4 Hz), 2.46 (2H, m).

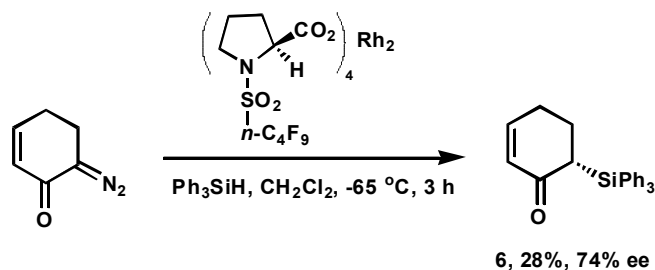

**(*S*)-6-Triphenylsilyl-cyclohex-2-enone (6).** Triphenylsilane (2642 mg, 10.16 mmol) and the *N*-nonafluorobutanesulfonylproline–Rh(II) complex<sup>2</sup> (136 mg, 0.076 mmol) were dissolved in 5.0 mL of CH<sub>2</sub>Cl<sub>2</sub>. The resulting solution was cooled to –65 °C and a solution of 6-diazo-cyclohex-2-enone (620 mg, 5.08 mmol) in 5.0 mL of CH<sub>2</sub>Cl<sub>2</sub> was added dropwise *via* a syringe pump over 3.0 h with the temperature of the reaction solution maintained at –65 °C. The reaction mixture was stirred for additional 15 min and then warmed to 23 °C. The reaction mixture was filtered through a SiO<sub>2</sub> plug, and concentrated *in vacuo*. Purification of the crude product by SiO<sub>2</sub> chromatography provided 501 mg of (*S*)-6-triethylsilyl-2-cyclohexen-1-one (28%) with 74% ee. Analytical HPLC conditions: (*S,S*) Whelk O1 column (4.6 mm × 25 cm), 225 nm, 10% *i*-PrOH–hexane, 1.0 mL/min, *R*<sub>t</sub><sub>major</sub> = 8.6 min (**6**); *R*<sub>t</sub><sub>minor</sub> = 23.3 min (*ent*-**6**). M.p. 109–111 °C; [*α*]<sub>D</sub><sup>23</sup> –81.3° (*c* 2.88, CHCl<sub>3</sub>); IR (film) 3074, 1656, 1430, 1109 cm<sup>–1</sup>; <sup>1</sup>H NMR (300 MHz, CDCl<sub>3</sub>) δ 7.59 (6H, d, *J* = 8.1 Hz), 7.43–7.35 (9H, m), 6.79 (1H, br d, *J* = 10.5

<sup>2</sup> (a) Ge, M.; Corey, E. J. *Tetrahedron Lett.* **2006**, 47, 2319–2321. (b) Doyle, M. P.; McKervey, M. A.; Ye, T. *Modern Catalytic Methods for Organic Synthesis with Diazo Compounds*; John Wiley: New York, 1998. Page 79. For preparation of a similar Rh(II) catalyst, see (c) Biffis, A.; Braga, M.; Cadamuro, S.; Tubaro, C.; Basato, M. *Org. Lett.* **2005**, 7, 1841–1844.

Hz), 5.96 (1H, d,  $J = 10.2$  Hz), 3.07 (1H, dd,  $J = 7.5, 5.7$  Hz), 2.17 (4H, br s).  $^{13}\text{C}$  NMR (100 MHz,  $\text{CDCl}_3$ )  $\delta$  200.1, 149.1, 136.2 (6C), 133.5 (3C), 130.9, 129.5 (3C), 127.7 (6C), 38.0, 25.3, 24.8. LRMS(ES $^{+}$ ): calcd. for  $[\text{M}+\text{H}]^{+}$   $\text{C}_{24}\text{H}_{23}\text{OSi}$  355.2, found 355.3; calcd. for  $[\text{M}+\text{NH}_4]^{+}$   $\text{C}_{24}\text{H}_{26}\text{NOSi}$  372.2, found 372.3.

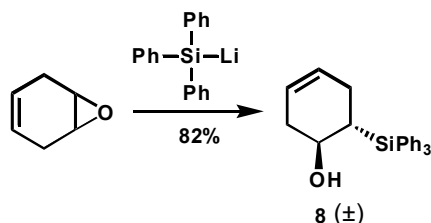

**( $\pm$ )-2-Triphenylsilyl-4-cyclohexen-1-ol (**8**).** To an oven-dried flask charged with finely cut lithium (4500 mg, 642 mmol, washed with hexane prior to use) was added triphenylsilyl chloride (9475 mg, 32.1 mmol) and 80 mL THF. The resulting solution was stirred at 23 °C for 3 h. A white precipitate formed in 20 minutes. The color of the suspension gradually changed from white to yellow to green and finally to clear dark brown. The resulting triphenylsilyllithium solution was added dropwise at 23 °C to a solution of 1,4-cyclohexadiene monoxide<sup>3</sup> (3236 mg, 33.7 mmol) in THF (45 mL). After stirring for 30 min, the reaction solution was slowly quenched with saturated *aq.*  $\text{NH}_4\text{Cl}$  and extracted 3 times with ether. The organic layers were combined, washed with brine, dried over  $\text{Na}_2\text{SO}_4$  and concentrated *in vacuo*. The crude product was redissolved in 100 mL of 1,2-dichloroethane at 60 °C on storage at 23 °C for 24 h, the alcohol **8** precipitated as white needles. The supernatant was decanted and the remaining solid was washed with hexane and dried *in vacuo* to afford pure **8** (6.87 g, 60%). The mother liquor and the washings were combined and concentrated *in vacuo*. Washing of the resulting light-yellow crude product repeatedly with MeOH afforded the alcohol **8** as white solid (2.43 g, 22%, 82% total yield). M.p. 194–196 °C; IR (film) 3575, 3066, 3024, 2900, 1486, 1428, 1216, 1108, 1065  $\text{cm}^{-1}$ ;  $^1\text{H}$  NMR (600 MHz,  $\text{CDCl}_3$ )  $\delta$  7.62 (6H, d,  $J = 7.2$  Hz), 7.41 (3H, dd,  $J = 7.2, 7.2$  Hz), 7.37 (6H, dd,  $J = 7.2, 7.2$  Hz), 5.60 (2H, br s), 3.92 (1H, m), 2.30 (2H, m), 2.17 (2H, m), 2.08 (1H, ddd,  $J = 10.8, 10.8, 4.8$  Hz), 1.51 (1H, d,  $J = 5.4$  Hz);  $^{13}\text{C}$  NMR (100 MHz,  $\text{CDCl}_3$ )  $\delta$  136.2 (6C), 134.5 (3C), 129.4 (3C), 127.9 (6C), 127.4,

<sup>3</sup> Perlman, N.; Albeck, A. *Synth. Commun.* **2000**, *30*, 4443.

124.8, 69.7, 35.9, 28.6, 28.4. LRMS (ES<sup>+</sup>): calcd. for [M+NH<sub>4</sub>]<sup>+</sup> C<sub>24</sub>H<sub>28</sub>NOSi 374.2, found 374.4.

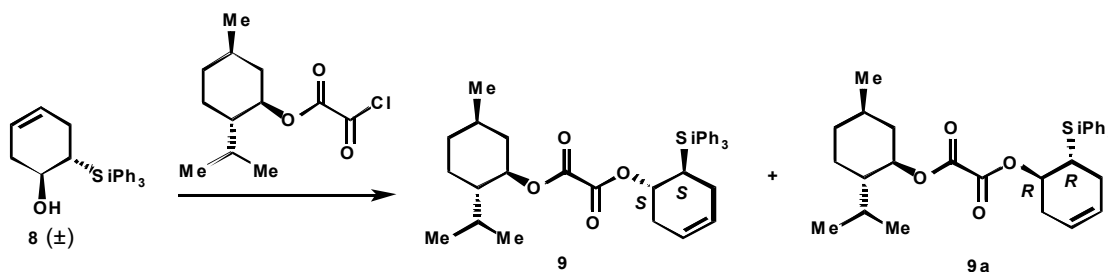

**Diastereomeric Oxalates 9 and 9a.** (±)-2-Triphenylsilyl-4-cyclohexen-1-ol (**8**) (5000 mg, 14.0 mmol) was dissolved in 47 mL of CH<sub>2</sub>Cl<sub>2</sub>. To the solution was added Et<sub>3</sub>N (2.34 mL, 16.8 mmol) and (1R,2S,5R)-2-isopropyl-5-methylcyclohexyl 2-chloro-2-oxoacetate<sup>4</sup> (3626 mg, 14.7 mmol) dropwise. The resulting mixture was stirred at 23 °C for 1 hour and quenched with 20 mL of H<sub>2</sub>O. The organic layer was washed with water and brine, dried over Na<sub>2</sub>SO<sub>4</sub>, filtered, and concentrated *in vacuo*. The light-yellow crude oil (9.4 g) was dissolved in 40 mL of isopropyl alcohol and stored at −20 °C for 24 h. A large amount of white precipitate was formed. The supernatant was decanted. The remaining solid was washed with hexane at 60 °C. The diastereomeric oxalate **9** (2.37g) was obtained with 90% de. Further recrystallization of both **9** and the mother liquor using *i*-PrOH provided the oxalate diastereomer **9** (3.05g, 99% de) in 38% yield and diastereomer **9a** (1.32 g, 99% de) in 17% yield. Analytical HPLC conditions: Chiralpak AD column (4.6 mm × 25 cm), 225 nm, 1% *i*-PrOH–hexane, 1.0 mL/min, Rt = 4.5 min (**9**) and 5.1 min (**9a**).

**Oxalate 9.** M.p. 148–150 °C; [ $\alpha$ ]<sub>D</sub><sup>23</sup> +4.1° (*c* 1.10, CHCl<sub>3</sub>); IR (film) 3070, 2956, 2871, 1760, 1735, 1428, 1314, 1175, 1109 cm<sup>−1</sup>; <sup>1</sup>H NMR (400 MHz, CDCl<sub>3</sub>)  $\delta$  7.58 (6H, d, *J* = 8.0 Hz), 7.40 (3H, dd, *J* = 7.6, 7.2 Hz), 7.34 (6H, dd, *J* = 7.6, 7.2 Hz), 5.62 (1H, br d, *J* = 10.0 Hz), 5.50 (1H, br d, *J* = 9.6 Hz), 5.13 (1H, m), 4.70 (1H, ddd, *J* = 11.2, 10.8, 4.4 Hz), 2.44 (1H, m), 2.40 (1H, m), 2.30 (1H, br d, *J* = 14.0 Hz), 2.23 (2H, m), 1.79 (1H, br d, *J* = 12.0 Hz), 1.74 (1H, m), 1.66 (2H, m), 1.44 (1H, br s), 1.30 (1H, br t, *J* = 12.0 Hz), 1.02–0.86 (3H, m), 0.91 (3H, d, *J* = 6.0 Hz), 0.81 (3H, d, *J* = 7.2 Hz), 0.70 (3H, d, *J* = 7.2

<sup>4</sup> Blanco, J. M.; Caamano, O.; Fernandez, F.; Garcia-Mera, X.; Lopez, C.; Rodriguez-Borges, J. E.; Hergueta, A. R. *Synthesis*, **1998**, 1590–1592.

Hz);  $^{13}\text{C}$  NMR (100 MHz,  $\text{CDCl}_3$ )  $\delta$  157.4, 157.1, 136.0 (6C), 133.6 (3C), 129.5 (3C), 127.8 (6C), 127.1, 123.6, 77.1, 75.7, 46.3, 40.0, 33.9, 31.4, 31.3, 27.6, 25.8, 23.7, 23.0, 21.9, 20.6, 16.0. LRMS(ES $^{+}$ ): calcd. for  $[\text{M}+\text{NH}_4]^{+} \text{C}_{36}\text{H}_{46}\text{NO}_4\text{Si}$  584.3, found 584.6.

**Oxalate 9a.** M.p. 113–114 °C;  $[\alpha]_{\text{D}}^{23} -53.5^{\circ}$  ( $c$  1.41,  $\text{CHCl}_3$ ); IR (film) 3072, 2958, 1758, 1737, 1428, 1314, 1177, 1150, 1109  $\text{cm}^{-1}$ ;  $^1\text{H}$  NMR (400 MHz,  $\text{CDCl}_3$ )  $\delta$  7.57 (6H, d,  $J = 8.0$  Hz), 7.41 (3H, dd,  $J = 7.6, 7.2$  Hz), 7.35 (6H, dd,  $J = 8.0, 7.2$  Hz), 5.63 (1H, br d,  $J = 10.0$  Hz), 5.51 (1H, br d,  $J = 10.0$  Hz), 5.09 (1H, ddd,  $J = 10.0, 8.0, 5.2$  Hz), 4.68 (1H, ddd,  $J = 11.2, 10.8, 4.4$  Hz), 2.42 (2H, m), 2.35–2.19 (3H, m), 1.83 (1H, br d,  $J = 12.0$  Hz), 1.73 (1H, m), 1.67 (2H, m), 1.44 (2H, m), 1.01 (1H, m), 0.89 (3H, d,  $J = 6.8$  Hz), 0.87 (3H, d,  $J = 7.2$  Hz), 0.79 (2H, m), 0.67 (3H, d,  $J = 6.8$  Hz);  $^{13}\text{C}$  NMR (100 MHz,  $\text{CDCl}_3$ )  $\delta$  156.9, 156.7, 136.0 (6C), 133.6 (3C), 129.5 (3C), 127.8 (6C), 127.3, 123.6, 77.2, 75.8, 46.3, 39.8, 33.8, 31.5, 31.2, 28.0, 26.0, 23.8, 23.3, 21.8, 20.6, 16.1. LRMS(AP $^{+}$ ): calcd. for  $[\text{M}+\text{NH}_4]^{+} \text{C}_{36}\text{H}_{46}\text{NO}_4\text{Si}$  584.3, found 584.0.

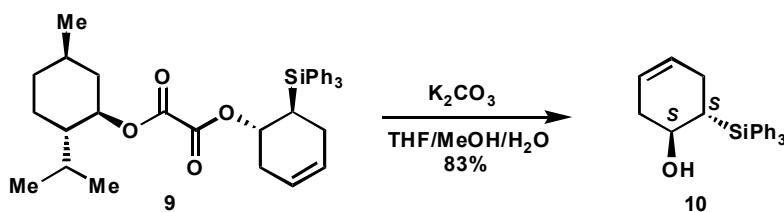

**(1*S*,2*S*)-2-Triphenylsilyl-4-cyclohexen-1-ol (10).** To a mixture of oxalate **9** (2290 mg, 4.04 mmol) and  $\text{K}_2\text{CO}_3$  (1393 mg, 10.1 mmol) was added THF (15 mL), MeOH (15 mL) and  $\text{H}_2\text{O}$  (5 mL). The resulting mixture was vigorously stirred at 23 °C for 2 h and the solvent was removed *in vacuo*. The crude product was taken up in  $\text{H}_2\text{O}$  and extracted 3 times with  $\text{CH}_2\text{Cl}_2$ . The organic layers were combined, washed with brine, dried over  $\text{Na}_2\text{SO}_4$ , filtered through  $\text{SiO}_2$ , and concentrated *in vacuo*. The obtained white solid (1.67 g) was washed with MeOH and dried *in vacuo* to provide (1*S*,2*S*)-2-triphenylsilyl-4-cyclohexen-1-ol (**10**) (1.0 g) of 99% ee. Concentration of the MeOH solution followed by sublimation *in vacuo* (5 mm Hg) at 100 °C provided compound **10** (200 mg) (83% total yield). M.p. 196–198 °C;  $[\alpha]_{\text{D}}^{23} +46.6^{\circ}$  ( $c$  1.03,  $\text{CHCl}_3$ ). HPLC conditions: Chiralcel OD column (4.6 mm  $\times$  25 cm), 225 nm, 2% *i*-PrOH–hexane, 1.0 mL/min,  $\text{Rt}_{\text{major}} = 9.9$  min (**10**);  $\text{Rt}_{\text{minor}} = 7.9$  min (*ent*-**10**).

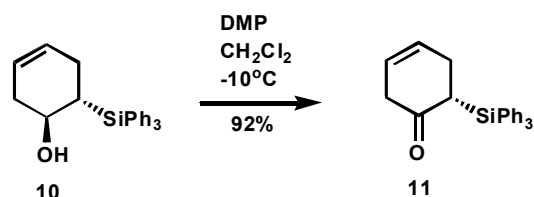

**$\beta,\gamma$ -enone 11.** (1*S*,2*S*)-2-triphenylsilyl-4-cyclohexen-1-ol (**10**) (99% ee, 500 mg, 1.41 mmol) was dissolved in 10 mL of CH<sub>2</sub>Cl<sub>2</sub>. To the solution at –10 °C was added dropwise 7.2 mL of Dess–Martin periodinane solution (0.3 M in CH<sub>2</sub>Cl<sub>2</sub>) over 1 h. After additional stirring for 10 min, the reaction mixture was quenched with 10% *aq.* NaHCO<sub>3</sub> (5 mL), warmed to 23 °C, and extracted with CH<sub>2</sub>Cl<sub>2</sub> (3 ×). The organic layers were combined, filtered, dried over Na<sub>2</sub>SO<sub>4</sub>, and concentrated to about 5 mL. The crude product solution was filtered through a silica plug, and eluted with a mixture of hexane–EtOAc (4:1). Concentration of the filtrate *in vacuo* provided  $\beta,\gamma$ -enone **11** in 92% yield (459 mg) with 98% ee. Analytical HPLC conditions: (*S,S*) Whelk O1 column (4.6 mm × 25 cm), 225 nm, 10% *i*-PrOH/hexane, 1.0 mL/min, *R*<sub>t</sub><sub>major</sub> = 7.2 min (**11**); *R*<sub>t</sub><sub>minor</sub> = 13.2 min (*ent*-**11**). M.p. 99–101°C; [ $\alpha$ ]<sub>D</sub><sup>23</sup> +99.6° (*c* 1.03, CHCl<sub>3</sub>); IR (film) 3074, 1683, 1430, 1109 cm<sup>–1</sup>; <sup>1</sup>H NMR (400 MHz, CDCl<sub>3</sub>)  $\delta$  7.59 (6H, d, *J* = 8.0 Hz), 7.43 (3H, dd, *J* = 7.2, 7.2 Hz), 7.36 (6H, dd, *J* = 8.0, 8.0 Hz), 5.70 (1H, m), 5.48 (1H, m), 3.36 (1H, ddd, *J* = 5.2, 5.2, 1.6 Hz), 2.74 (2H, br s), 2.72 (1H, br d, *J* = 21.6 Hz), 2.41 (1H, br d, *J* = 21.6 Hz). <sup>13</sup>C NMR (100 MHz, CDCl<sub>3</sub>)  $\delta$  210.4, 136.2 (6C), 132.7 (3C), 129.8 (3C), 127.8 (6C), 126.3, 124.3, 40.4, 39.9, 27.9. LRMS(AP<sup>+</sup>): calcd. for [M+NH<sub>4</sub>]<sup>+</sup> C<sub>24</sub>H<sub>26</sub>NOSi 372.2, found 372.1.

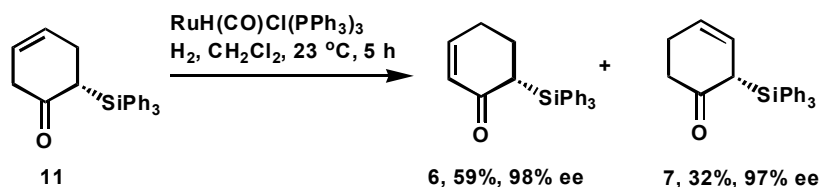

**6-(*S*)-Triphenylsilyl-2-cyclohexenone (6).**  $\beta,\gamma$ -enone **11** (98% ee, 336 mg, 0.95 mmol) was dissolved in 7 mL of CH<sub>2</sub>Cl<sub>2</sub> and treated with RuH(CO)Cl(PPh<sub>3</sub>)<sub>3</sub> (45 mg, 0.047 mmol). The resulting solution was stirred under H<sub>2</sub> (1 atm) at 23 °C for 5 h. The resulting solution was concentrated *in vacuo*. Purification of the crude product by SiO<sub>2</sub> chromatography provided 6-(*S*)-triphenylsilyl-2-cyclohexenone (**6**) as a white solid in

59% yield (199 mg, 98% ee) and 2-(*S*)-triphenylsilyl-3-cyclohexenone (**7**) as colorless oil in 32% yield (107 mg, 97% ee). Analytical HPLC conditions: (*S,S*) Whelk O1 column (4.6 mm × 25 cm), 225 nm, 10% *i*-PrOH–hexane, 1.0 mL/min,  $R_{t\text{major}} = 8.6$  min (**6**);  $R_{t\text{minor}} = 23.3$  min (*ent*-**6**);  $R_{t\text{major}} = 6.7$  min (**7**);  $R_{t\text{minor}} = 13.6$  min (*ent*-**7**).

**6-(*S*)-Triphenylsilyl-2-cyclohexenone (6).** M.p. 109–111 °C;  $[\alpha]_{\text{D}}^{23} -81.3^\circ$  (*c* 2.88, CHCl<sub>3</sub>); IR (film) 3074, 1656, 1430, 1109 cm<sup>-1</sup>; <sup>1</sup>H NMR (300 MHz, CDCl<sub>3</sub>)  $\delta$  7.59 (6H, d, *J* = 8.1 Hz), 7.43–7.35 (9H, m), 6.79 (1H, br d, *J* = 10.5 Hz), 5.96 (1H, d, *J* = 10.2 Hz), 3.07 (1H, dd, *J* = 7.5, 5.7 Hz), 2.17 (4H, br s). <sup>13</sup>C NMR (100 MHz, CDCl<sub>3</sub>)  $\delta$  200.1, 149.1, 136.2 (6C), 133.5 (3C), 130.9, 129.5 (3C), 127.7 (6C), 38.0, 25.3, 24.8. LRMS(ES<sup>+</sup>): calcd. for  $[M+H]^+$  C<sub>24</sub>H<sub>23</sub>OSi 355.2, found 355.3; calcd. for  $[M+NH_4]^+$  C<sub>24</sub>H<sub>26</sub>NOSi 372.2, found 372.3.

**2-(*S*)-Triphenylsilyl-3-cyclohexenone (7).**  $[\alpha]_{\text{D}}^{23} +59.6^\circ$  (*c* 1.07, CHCl<sub>3</sub>); IR (film) 3047, 2923, 1690, 1428, 1109 cm<sup>-1</sup>; <sup>1</sup>H NMR (400 MHz, CDCl<sub>3</sub>)  $\delta$  7.60 (6H, d, *J* = 7.6 Hz), 7.44 (3H, dd, *J* = 7.6, 7.6 Hz), 7.38 (6H, dd, *J* = 7.6, 7.6 Hz), 5.73 (2H, s), 3.79 (1H, s), 2.29 (1H, m), 2.15 (2H, m), 1.86 (1H, m). <sup>13</sup>C NMR (100 MHz, CDCl<sub>3</sub>)  $\delta$  210.0, 136.2 (6C), 132.2 (3C), 130.0 (3C), 127.9 (6C), 125.4, 125.1, 45.5, 38.5, 25.8. LRMS(AP<sup>+</sup>): calcd. for  $[M+NH_4]^+$  C<sub>24</sub>H<sub>26</sub>NOSi 372.2, found 372.2.

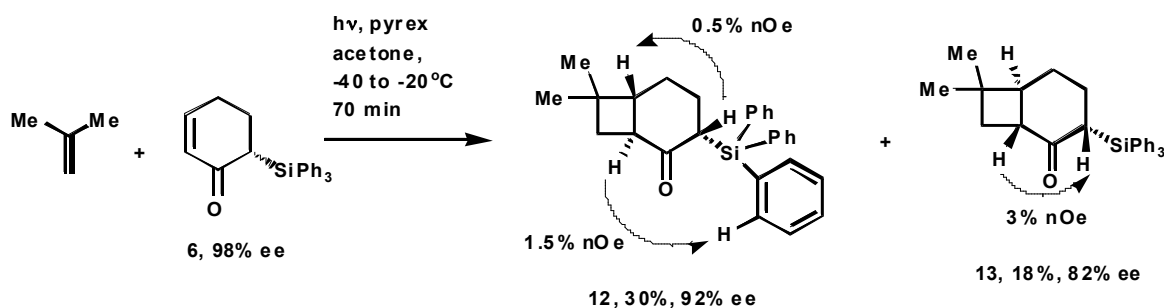

**[2+2] cycloadducts 12 and 13.** A solution of 6-(*S*)-triphenylsilyl-2-cyclohexenone (**6**) (98% ee, 199 mg, 0.56 mmol) in acetone (80 mL) was placed under a positive pressure of N<sub>2</sub> in a Hanovia<sup>®</sup> photochemical reaction vessel fitted with a Pyrex<sup>®</sup> immersion well and a magnetic stir bar. The running water used to cool the immersion well was first passed through a 50 inch copper coil (1/4" O.D. × 0.030" wall) immersed in ice. The reaction vessel was cooled with an external dry ice–acetone bath at -40°C (internal temperature,

measured by a thermocouple immersed into the solution). 2-Methylpropene (10 mL) was condensed into the reaction vessel with stirring at the same time. A medium pressure mercury lamp 450W Hanovia<sup>®</sup> UV lamp was installed to the immersion well and the irradiation was started. During the irradiation the internal temperature was maintained between  $-40^{\circ}\text{C}$  and  $-20^{\circ}\text{C}$ . The irradiation was stopped as soon as TLC analysis of an aliquot showed complete consumption of the enone compound **6** (70 min). The reaction mixture was slowly warmed to room temperature and concentrated *in vacuo*. Purification of the crude product by flash chromatography over silica gel (hexanes/EtOAc = 20 : 1) provided 68 mg (30%, 92% ee) of cycloadduct **12** as a white solid, and a non-polar fraction as a colorless oil. Further purification of the non-polar fraction by Chiralpak AD column (2 cm  $\times$  25 cm) using 5% *i*-PrOH–hexane provided 40 mg of cycloadduct **13** (18%, 82% ee) as colorless oil. Analytical HPLC conditions: (S,S) Whelk O1 column (4.6 mm  $\times$  25 cm), 2%-30% *i*-PrOH–hexane over 30 min, 1.0 mL/min, 225 nm,  $R_{t\text{major}} = 11.8$  min (**12**);  $R_{t\text{minor}} = 19.0$  (*ent*-**12**);  $R_{t\text{major}} = 7.3$  min (**13**);  $R_{t\text{minor}} = 8.9$  min (*ent*-**13**).

**Cycloadduct 12.** M.p. 90–92  $^{\circ}\text{C}$ ;  $[\alpha]_{\text{D}}^{23} +56.8^{\circ}$  (*c* 1.01,  $\text{CHCl}_3$ ); IR (film) 2956, 2867, 1686, 1430, 1109  $\text{cm}^{-1}$ ;  $^1\text{H}$  NMR (400 MHz,  $\text{CDCl}_3$ )  $\delta$  7.62 (6H, dd,  $J = 8.0, 1.6$  Hz), 7.44–7.36 (9H, m), 3.20 (1H, dd,  $J = 8.0, 2.8$  Hz), 2.44 (1H, ddd,  $J = 12.8, 10.4, 6.8$  Hz), 2.38 (1H, m), 2.25 (1H, m), 1.85 (1H, ddd,  $J = 12.8, 12.8, 4.4$  Hz), 1.79 (1H, dd,  $J = 10.4, 10.0$  Hz), 1.44 (1H, dd,  $J = 10.4, 6.4$  Hz), 1.32 (1H, m), 1.07 (1H, dddd,  $J = 22.8, 12.0, 6.4, 1.6$  Hz), 0.96 (3H, s), 0.72 (3H, s).  $^{13}\text{C}$  NMR (100 MHz,  $\text{CDCl}_3$ )  $\delta$  210.5, 136.2 (6C), 133.3 (3C), 129.9 (3C), 128.0 (6C), 55.2, 46.9, 40.6, 38.4, 35.3, 29.7, 29.4, 23.6, 20.1. LRMS(AP<sup>+</sup>): calcd. for  $[\text{M}+\text{H}]^+ \text{C}_{28}\text{H}_{31}\text{OSi}$  411.2, found 411.3.

**Cycloadduct 13.**  $[\alpha]_{\text{D}}^{23} +51.3^{\circ}$  (*c* 0.87,  $\text{CHCl}_3$ ); IR (film) 3070, 2933, 2863, 1702, 1428, 1108, 909  $\text{cm}^{-1}$ ;  $^1\text{H}$  NMR (400 MHz,  $\text{CDCl}_3$ )  $\delta$  7.56 (6H, dd,  $J = 8.0, 1.6$  Hz), 7.39–7.32 (9H, m), 2.98 (1H, ddd,  $J = 11.2, 10.7, 7.2$  Hz), 2.76 (1H, dd,  $J = 12.8, 6.0$  Hz), 2.31 (1H, m), 1.99 (1H, ddd,  $J = 25.2, 12.4, 5.2$  Hz), 1.91 (1H, ddd,  $J = 12.4, 12.4, 3.2$  Hz), 1.88 (1H, dd,  $J = 10.4, 10.4$  Hz), 1.64 (1H, m), 1.61 (1H, dd,  $J = 10.4, 6.8$  Hz), 1.55 (1H, m), 1.15 (3H, s), 1.03 (3H, s).  $^{13}\text{C}$  NMR (100 MHz,  $\text{CDCl}_3$ )  $\delta$  209.9, 136.2 (6C), 134.3 (3C), 129.2 (3C), 127.7 (6C), 58.3, 49.9, 40.2, 39.4, 36.0, 32.4, 29.4, 27.6, 20.4. LRMS(AP<sup>+</sup>): calcd. for  $\text{M}^+ \text{C}_{28}\text{H}_{30}\text{OSi}$  410.2, found 410.3.



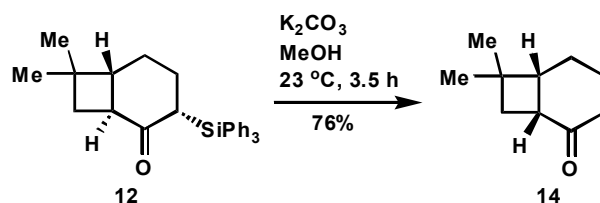

**(*R,R*)-(-)-7,7-Dimethyl-bicyclo[4.2.0]octan-2-one (**14**)**. Cycloadduct **12** (92% ee, 54 mg, 0.13 mmol) was dissolved in 1.5 mL of MeOH followed by addition of  $\text{K}_2\text{CO}_3$  (36 mg, 0.26 mmol). The resulting mixture was stirred at  $23\text{ }^\circ\text{C}$  for 3.5 h, followed by filtration to remove the solid. The filtrate was concentrated and purified on silica gel using hexane–ether (10 : 1). (*R,R*)-(-)-7,7-Dimethyl-bicyclo[4.2.0]octan-2-one (**14**) was obtained in 76% yield (15 mg) in 92% ee.  $[\alpha]_{\text{D}}^{23} -152.8^\circ$  ( $c$  1.41,  $\text{CHCl}_3$ ). The NMR and IR spectra of **14** are consistent with the data reported in literature.<sup>5</sup> Analytical HPLC conditions: Chiralpak IA column (4.6 mm  $\times$  25 cm), 20%  $\text{CH}_2\text{Cl}_2$ –hexane, 1.0 mL/min, 280 nm,  $\text{Rt}_{\text{major}} = 8.7\text{ min}$  (**14**);  $\text{Rt}_{\text{minor}} = 7.2\text{ min}$  (*ent*-**14**).

<sup>5</sup> (a) Corey, E. J.; Bass, J. D.; LeMahieu, R.; Mitra, R. B. *J. Am. Chem. Soc.* **1964**, 86, 5570–5583. (b) Liu, D.; Hong, S.; Corey, E. J. *J. Am. Chem. Soc.* **2006**, 128, 8160–8161.

## STANDARD PROTON PARAMETERS

exp1 PROTON

|             |             |      |            |
|-------------|-------------|------|------------|
| date        | Jan 11 2006 | temp | 20.0       |
| solvent     | CDCl3       | gain | not used   |
| file        | exp         | spin | 0          |
| ACQUISITION |             | hst  | 0.008      |
| sw          | 9596.9      | pw90 | 7.400      |
| at          | 2.048       | alfa | 0          |
| np          | 39310       | il   | FLAGS      |
| fb          | 5000        | in   | n          |
| bs          | 4           | in   | n          |
| ss          | 2           | dp   | y          |
| dl          | 1.000       | hs   | PROCESSING |
| nt          | 128         | lb   | 0.10       |
| ct          | 16          | fn   | not used   |
| TRANSMITTER |             | h1   | DISPLAY    |
| to          | 599.750     | sp   | -1222.0    |
| sfrq        | 576.6       | wp   | 9596.6     |
| tofr        | 60          | rfl  | 5576.6     |
| tpwr        | 3.700       | rfp  | 4354.4     |
| pw          | DECOUPLER   | rp   | -173.6     |
| dn          | C13         | lp   | 1.5        |
| dof         | 0           | plot |            |
| dm          | nnn         | wc   | 250        |
| decwave     | 49          | sc   | 0          |
| dpwr        | 14800       | vs   | 118        |
| dmf         |             | th   | 7          |
|             |             | nm   | cdc ph     |

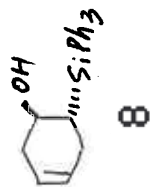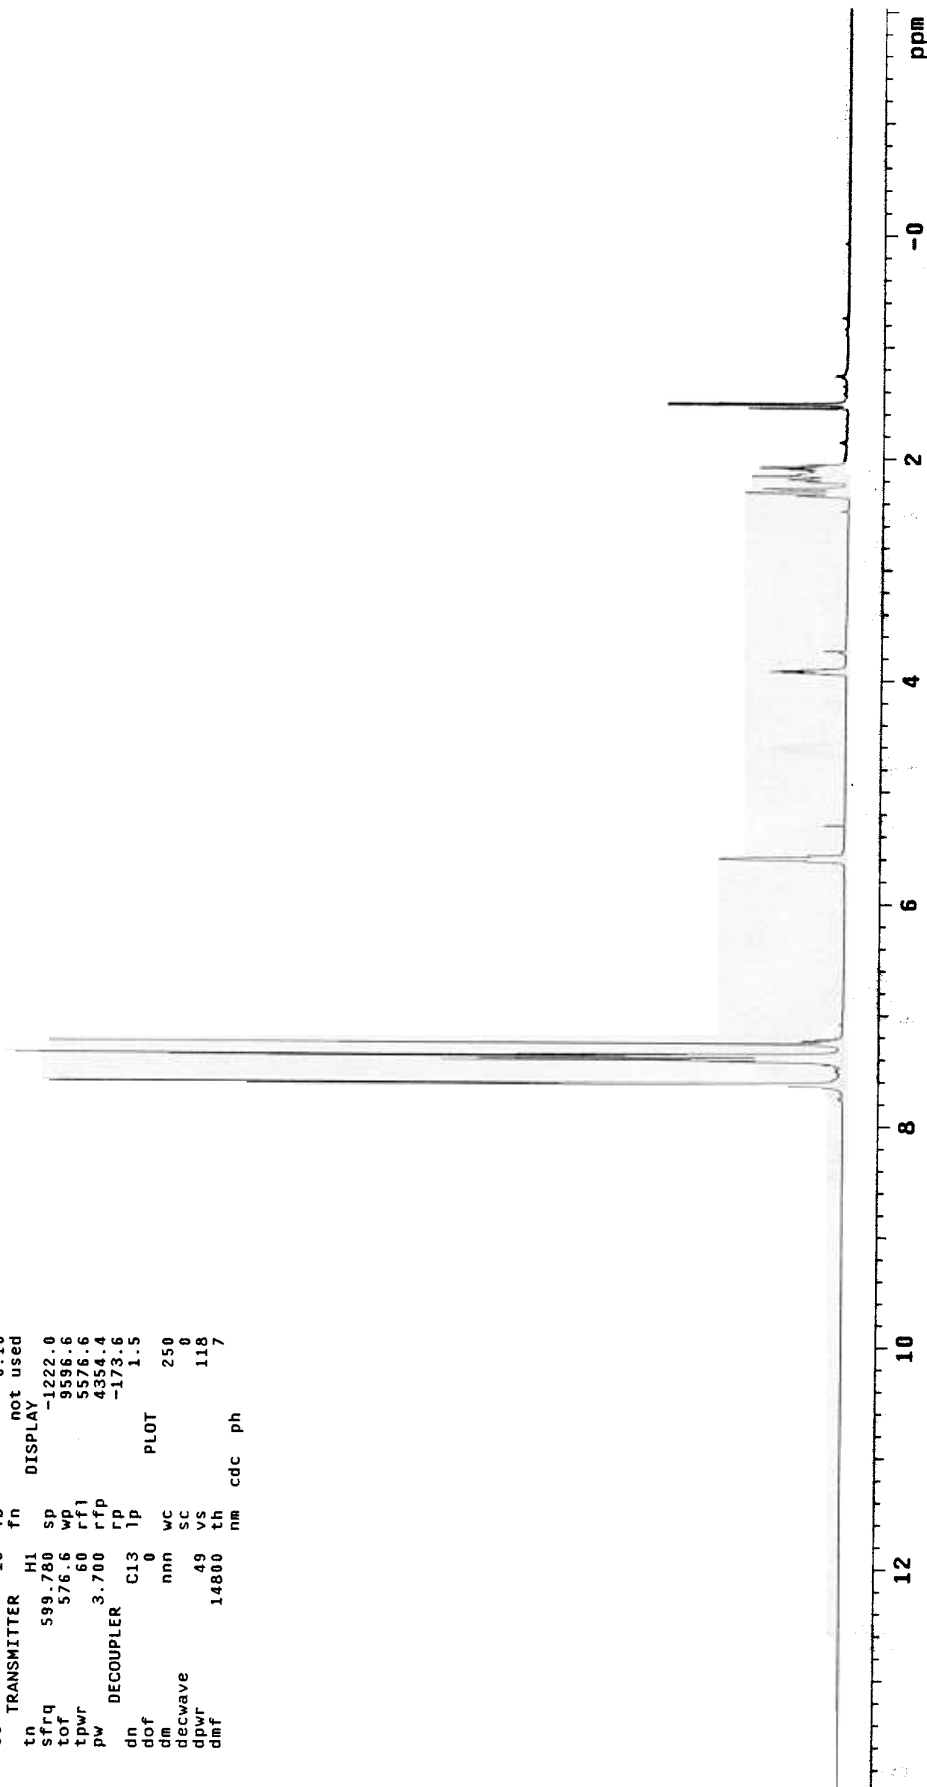

## exp2 std13c

| SAMPLE      |             | DEC. & VT  |          |
|-------------|-------------|------------|----------|
| date        | Dec 20 2005 | dfrq       | 399.839  |
| solvent     | CDC13       | dn         | H1       |
| exp         |             | dpwr       | 47       |
| file        |             | dof        | 0        |
| ACQUISITION |             |            |          |
| sfrq        | 100.548     | dm         | yyy      |
| tn          | C13         | dmm        | w        |
| at          | 1.311       | dmf        | 17800    |
| temp        | 62862       | temp       | 23.0     |
| sw          | 23980.8     | PROCESSING |          |
| sf          | 13200       | lb         | 1.00     |
| bs          | 8           | wfile      |          |
| ss          | 2           | proc       | ft       |
| tpwr        | 60          | fn         | not used |
| pw          | 4.0         |            |          |
| wd          |             | werr       |          |
| tof         | 0           | wexp       |          |
| nt          | 10000       | wbs        |          |
| ct          | 144         | wnt        |          |
| alock       | n           |            |          |
| gain        | 30          |            |          |

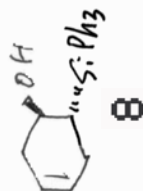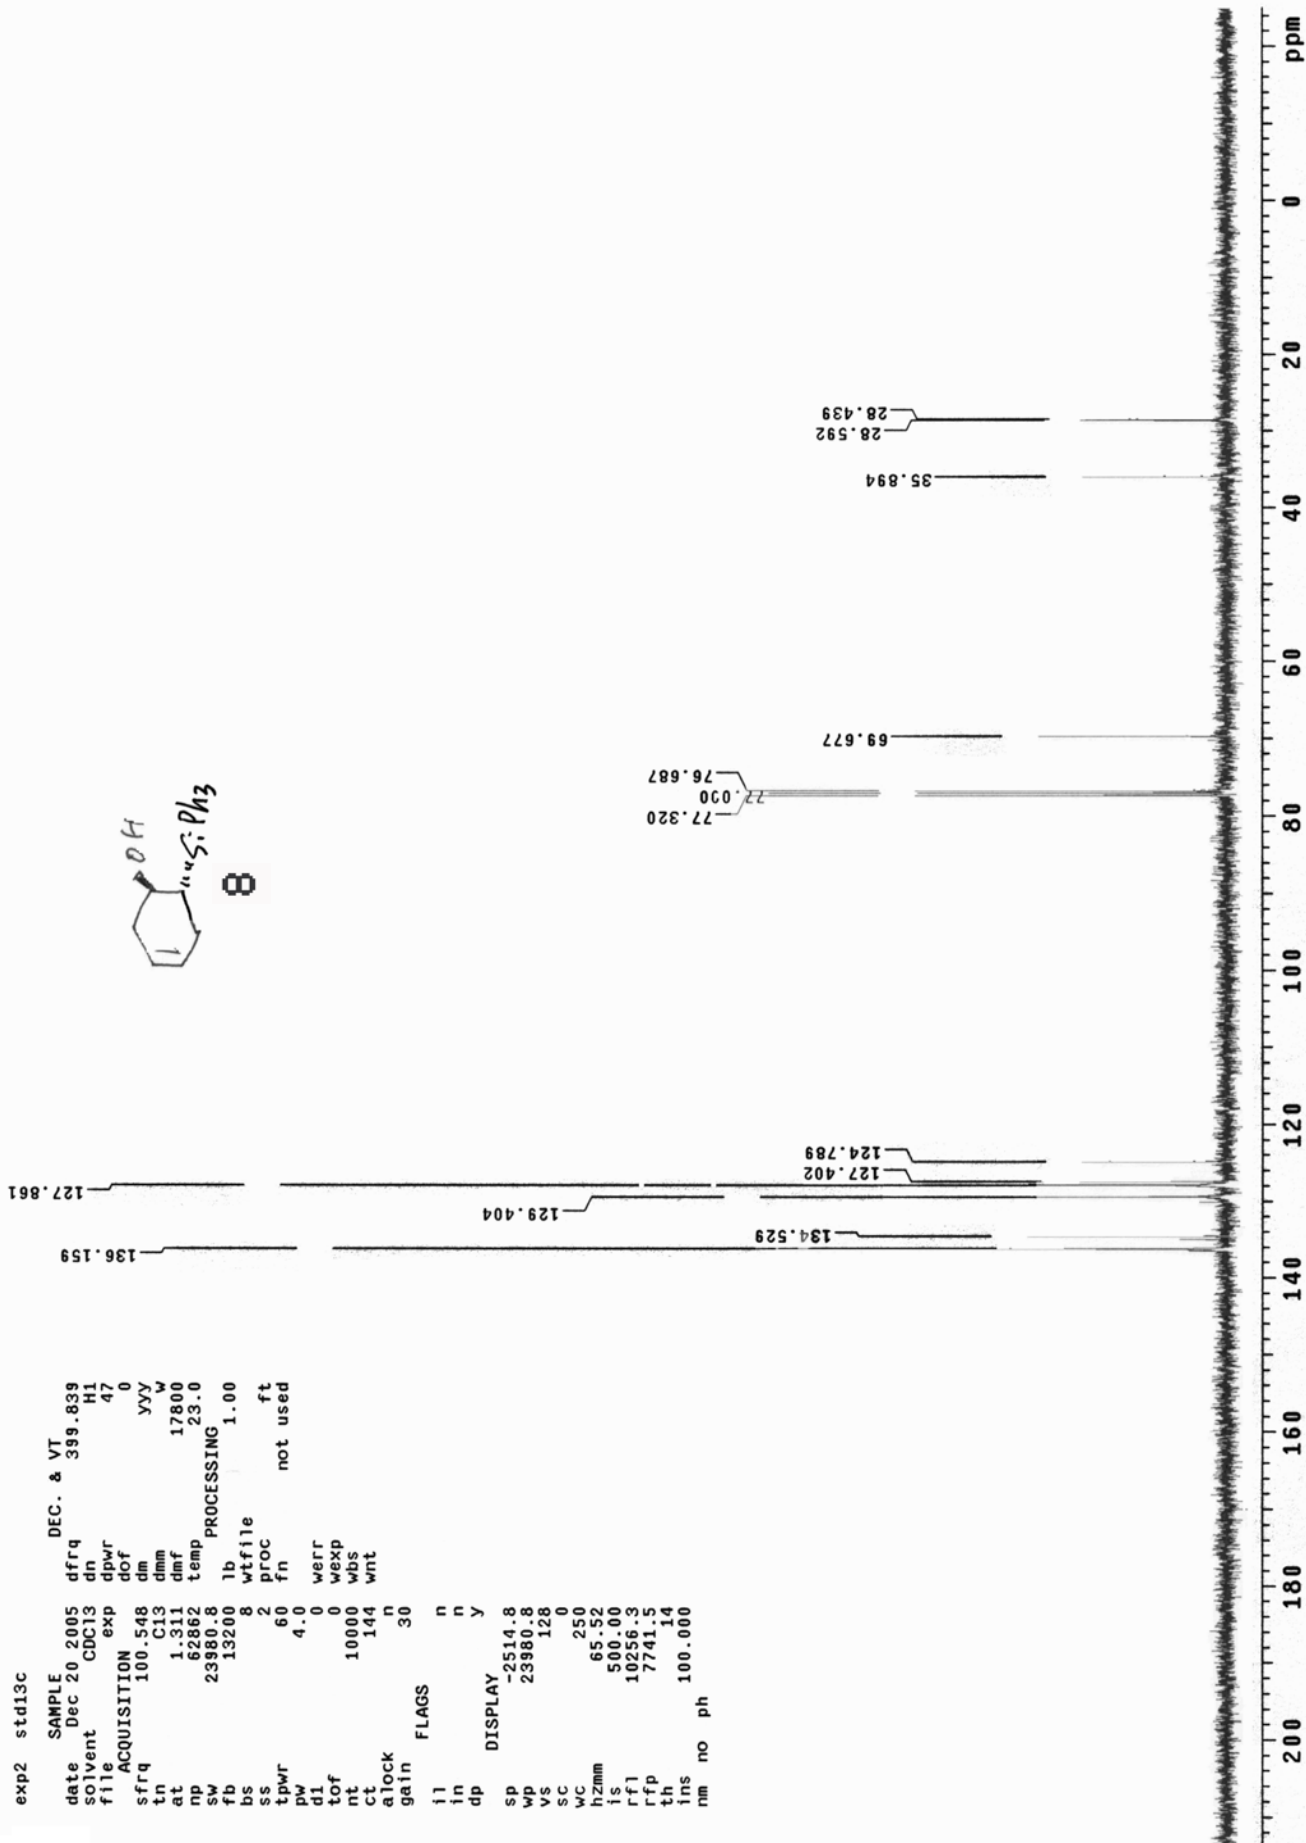

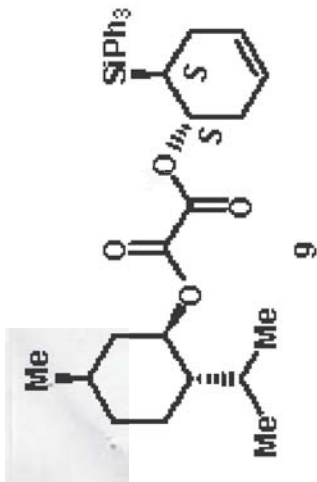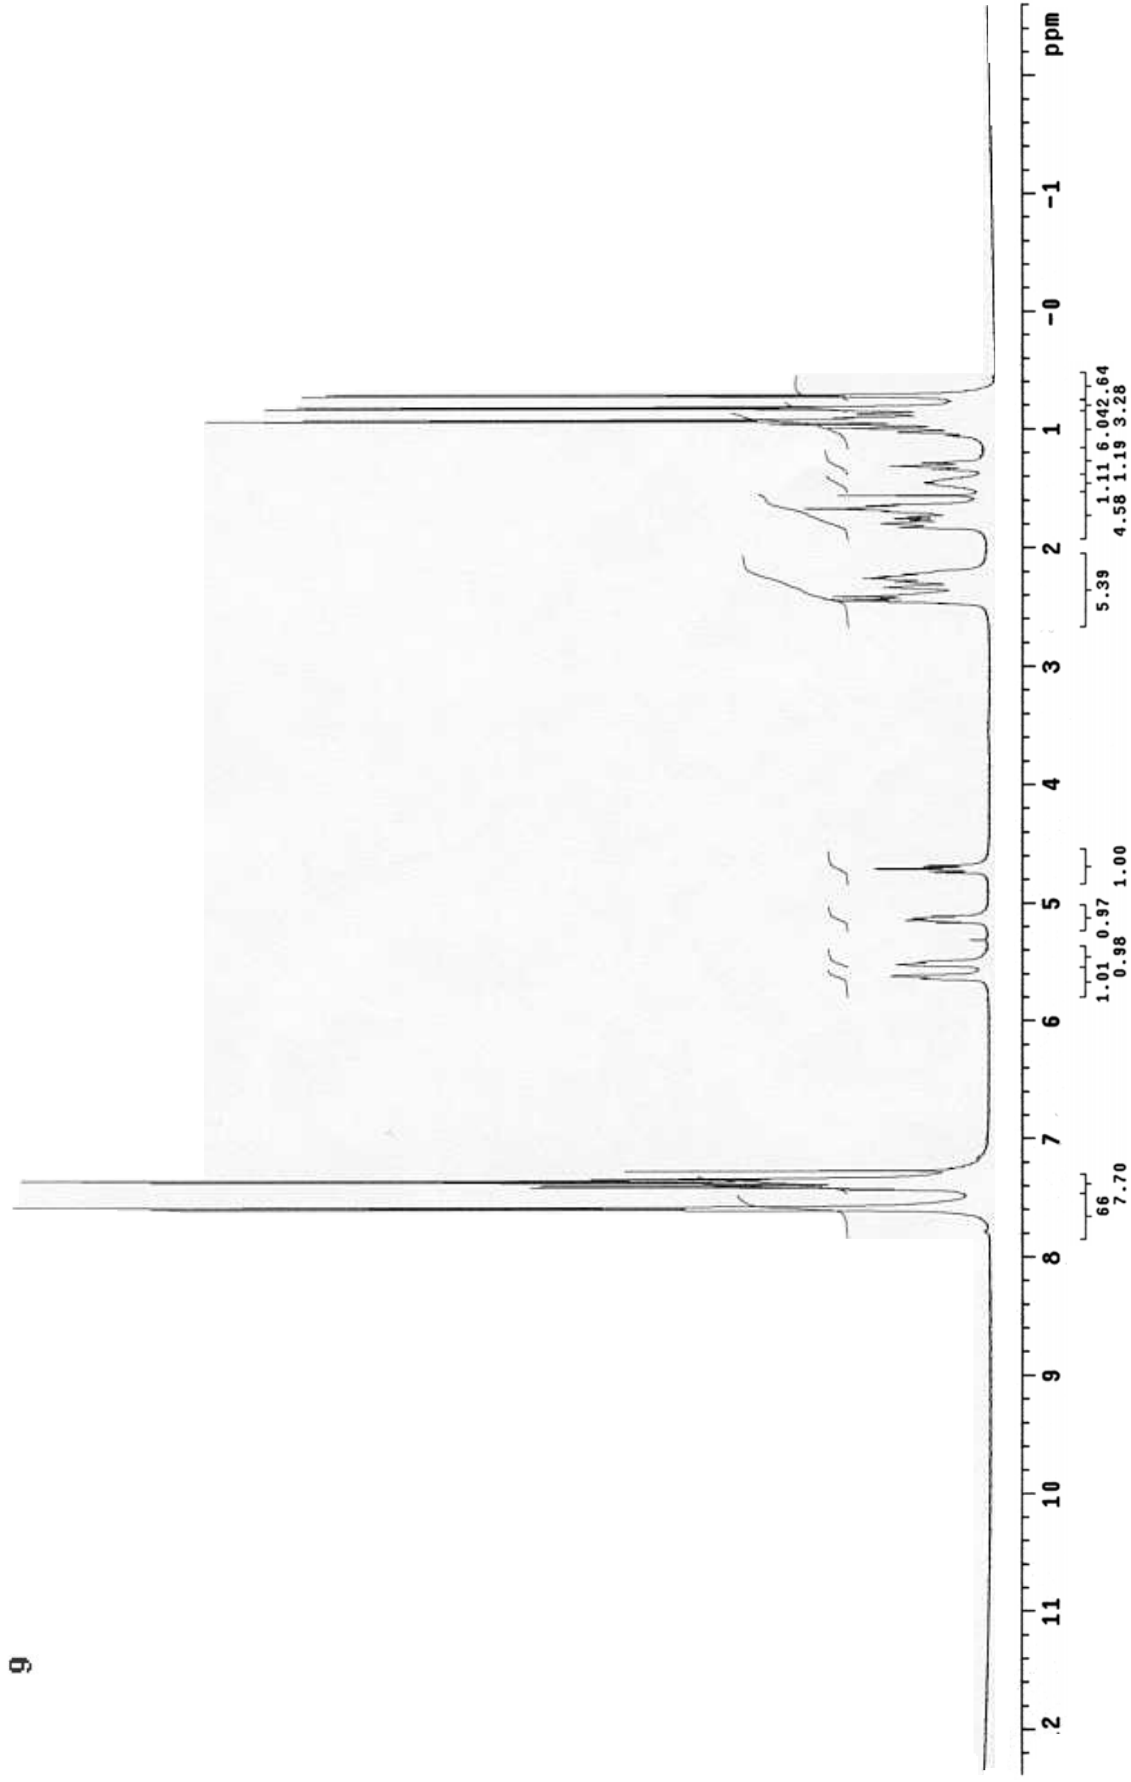

13C OBSERVE

exp5 std13c

|             |            |           |          |
|-------------|------------|-----------|----------|
| SAMPLE      |            | DEC. & VT |          |
| date        | Aug 1 2006 | dfrq      | 400.021  |
| solvent     | CDCl3      | dn        | H1       |
| file        | exp        | dpwr      | 46       |
| ACQUISITION |            | dof       | 0        |
| tn          | 100.594    | dm        | yyv      |
| at          | 1.311      | dmm       | w        |
| np          | 65536      | dmf       | 9999     |
| sw          | 25000.0    | temp      | 22.0     |
| fb          | 13800      | lb        | 1.00     |
| bs          | 8          | wfile     | not used |
| tpwr        | 61         | proc      | ft       |
| dl          | 3.2        | fn        | 0        |
| tof         | 0          | werr      | svf(nl)  |
| nt          | 1000       | wexp      |          |
| ct          | 96         | wbs       |          |
| alock       | n          | wnt       |          |
| gain        | not used   | flags     |          |
| il          | n          |           |          |
| in          | n          |           |          |
| dp          | y          |           |          |
| DISPLAY     |            |           |          |
| sp          | -3023.1    |           |          |
| wp          | 24999.2    |           |          |
| vs          | 152        |           |          |
| sc          | 0          |           |          |
| wc          | 250        |           |          |
| hzm         | 0.79       |           |          |
| is          | 500.00     |           |          |
| rfl         | 10788.9    |           |          |
| rtp         | 7745.0     |           |          |
| th          | 6          |           |          |
| ins         | 100.000    |           |          |
| nm          |            |           |          |
| ph          |            |           |          |

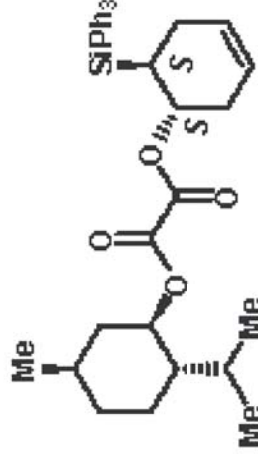

9

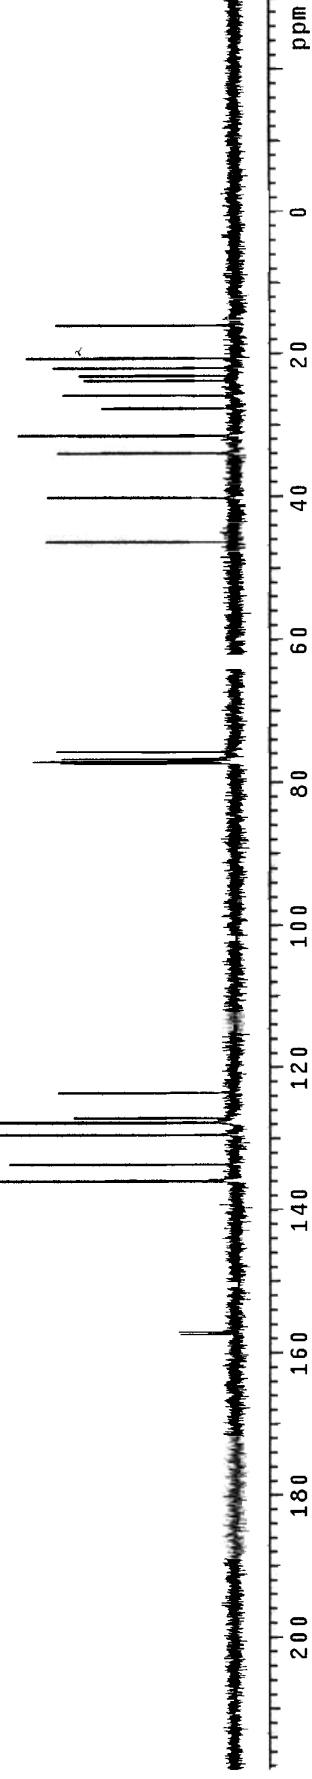

exp2 std1h

| SAMPLE      |             | DEC. & VT  |          |
|-------------|-------------|------------|----------|
| date        | Jul 19 2006 | dfrq       | 399.433  |
| solvent     | CDC13       | dn         | H1       |
| file        | exp         | dpwr       | 43       |
|             |             | dof        | 0        |
| ACQUISITION |             |            |          |
| sfrq        | 399.433     | dm         | nnn      |
| tn          | H1          | dmm        | C        |
| at          | 2.731       | dmf        | 12200    |
| np          | 32768       | temp       | 23.0     |
| sw          | 5998.8      | PROCESSING |          |
| fb          | 3400        | lb         | 0.10     |
| bs          | 4           | wtfile     |          |
| ss          | 2           | proc       | ft       |
| tpwr        | 59          | fn         | not used |
| pw          | 12.0        |            |          |
| d1          | 0           | werr       |          |
| tof         | 0           | wexp       |          |
| nt          | 128         | wbs        |          |
| ct          | 64          | wnt        |          |
| alock       | n           |            |          |
| gain        | not used    |            |          |
| FLAGS       |             |            |          |
| il          | n           |            |          |
| in          | n           |            |          |
| dp          | y           |            |          |
| DISPLAY     |             |            |          |
| sp          | -1031.8     |            |          |
| wp          | 5998.8      |            |          |
| vs          | 151         |            |          |
| sc          | 0           |            |          |
| wc          | 250         |            |          |
| hzmm        | 10.83       |            |          |
| is          | 230.89      |            |          |
| rfl         | 1031.8      |            |          |
| rtp         | 0           |            |          |
| th          | 8           |            |          |
| ins         | 1.000       |            |          |
| nm          | ph          |            |          |

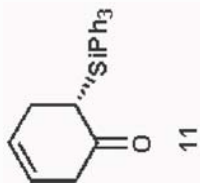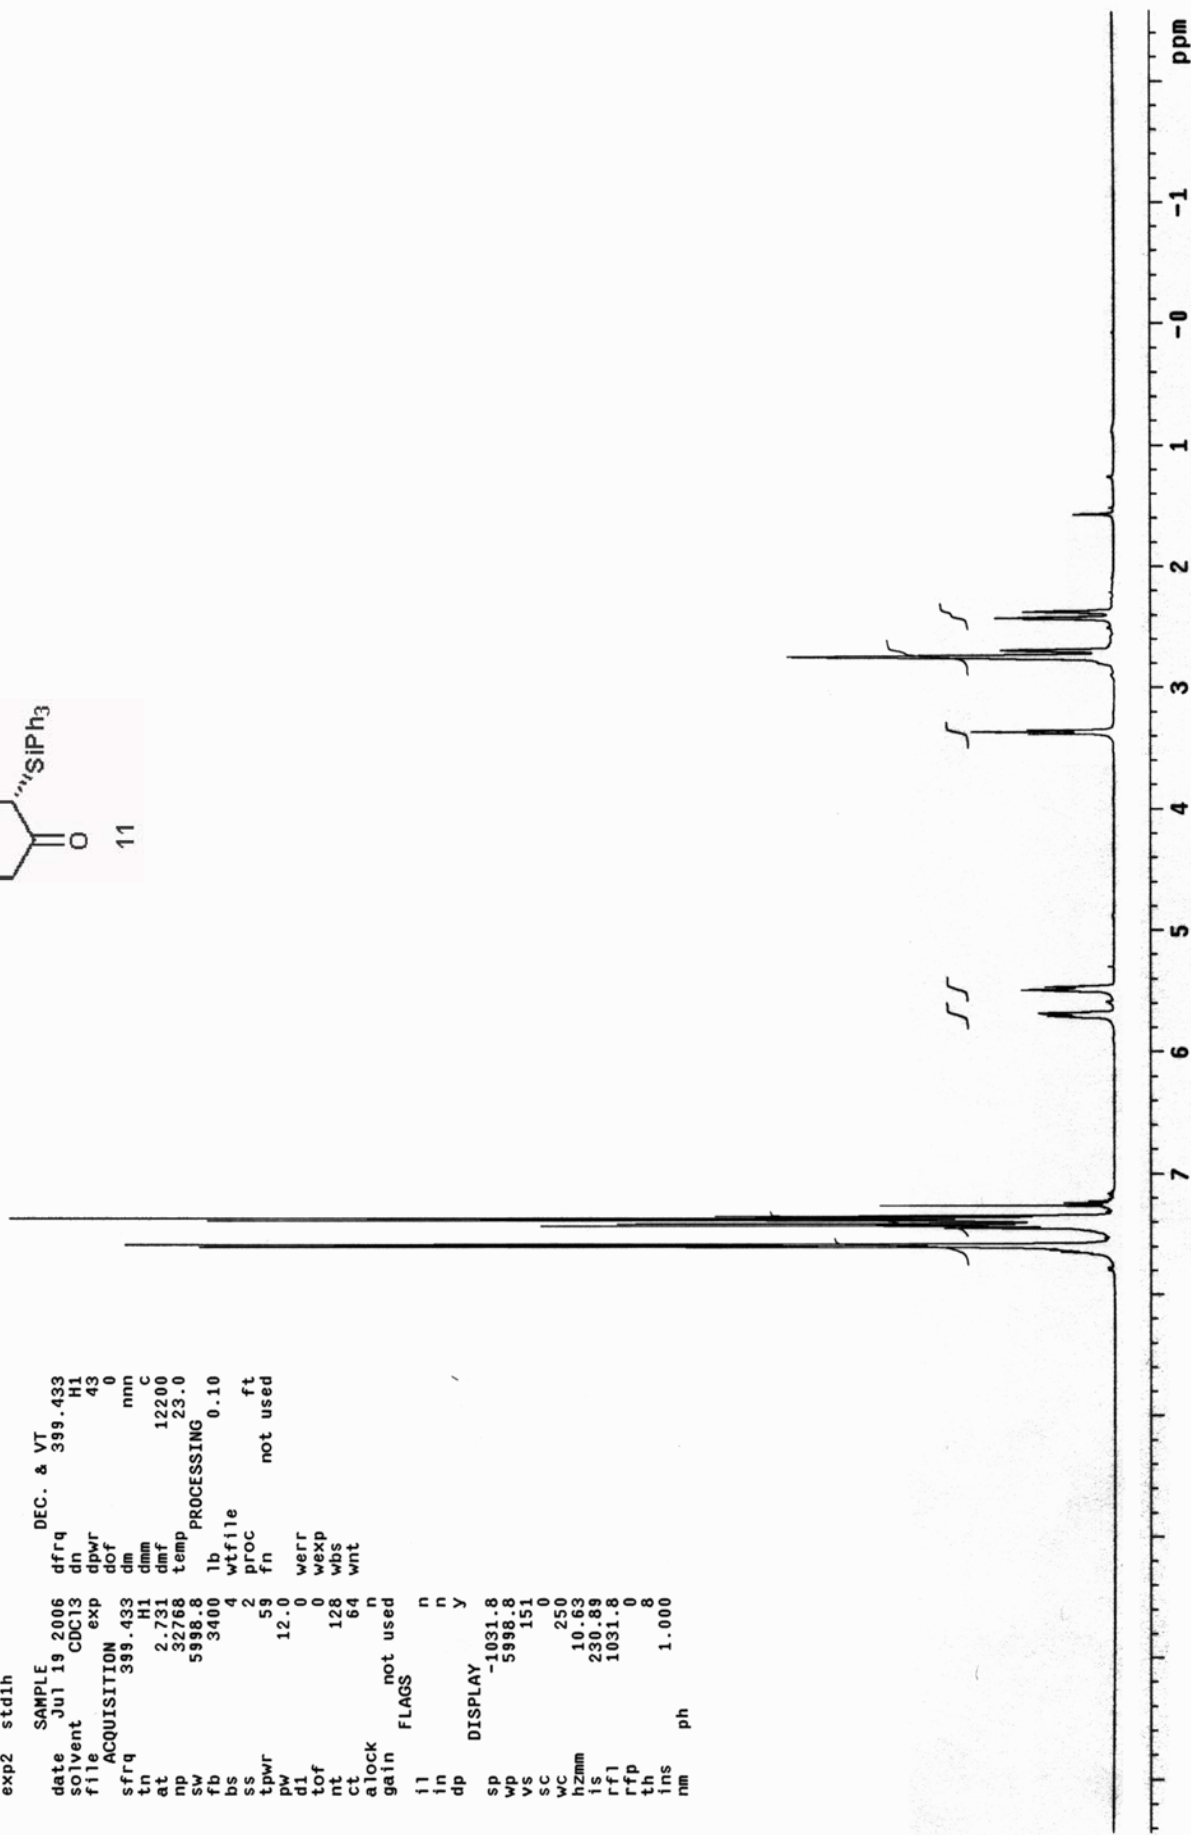

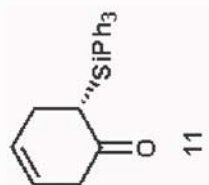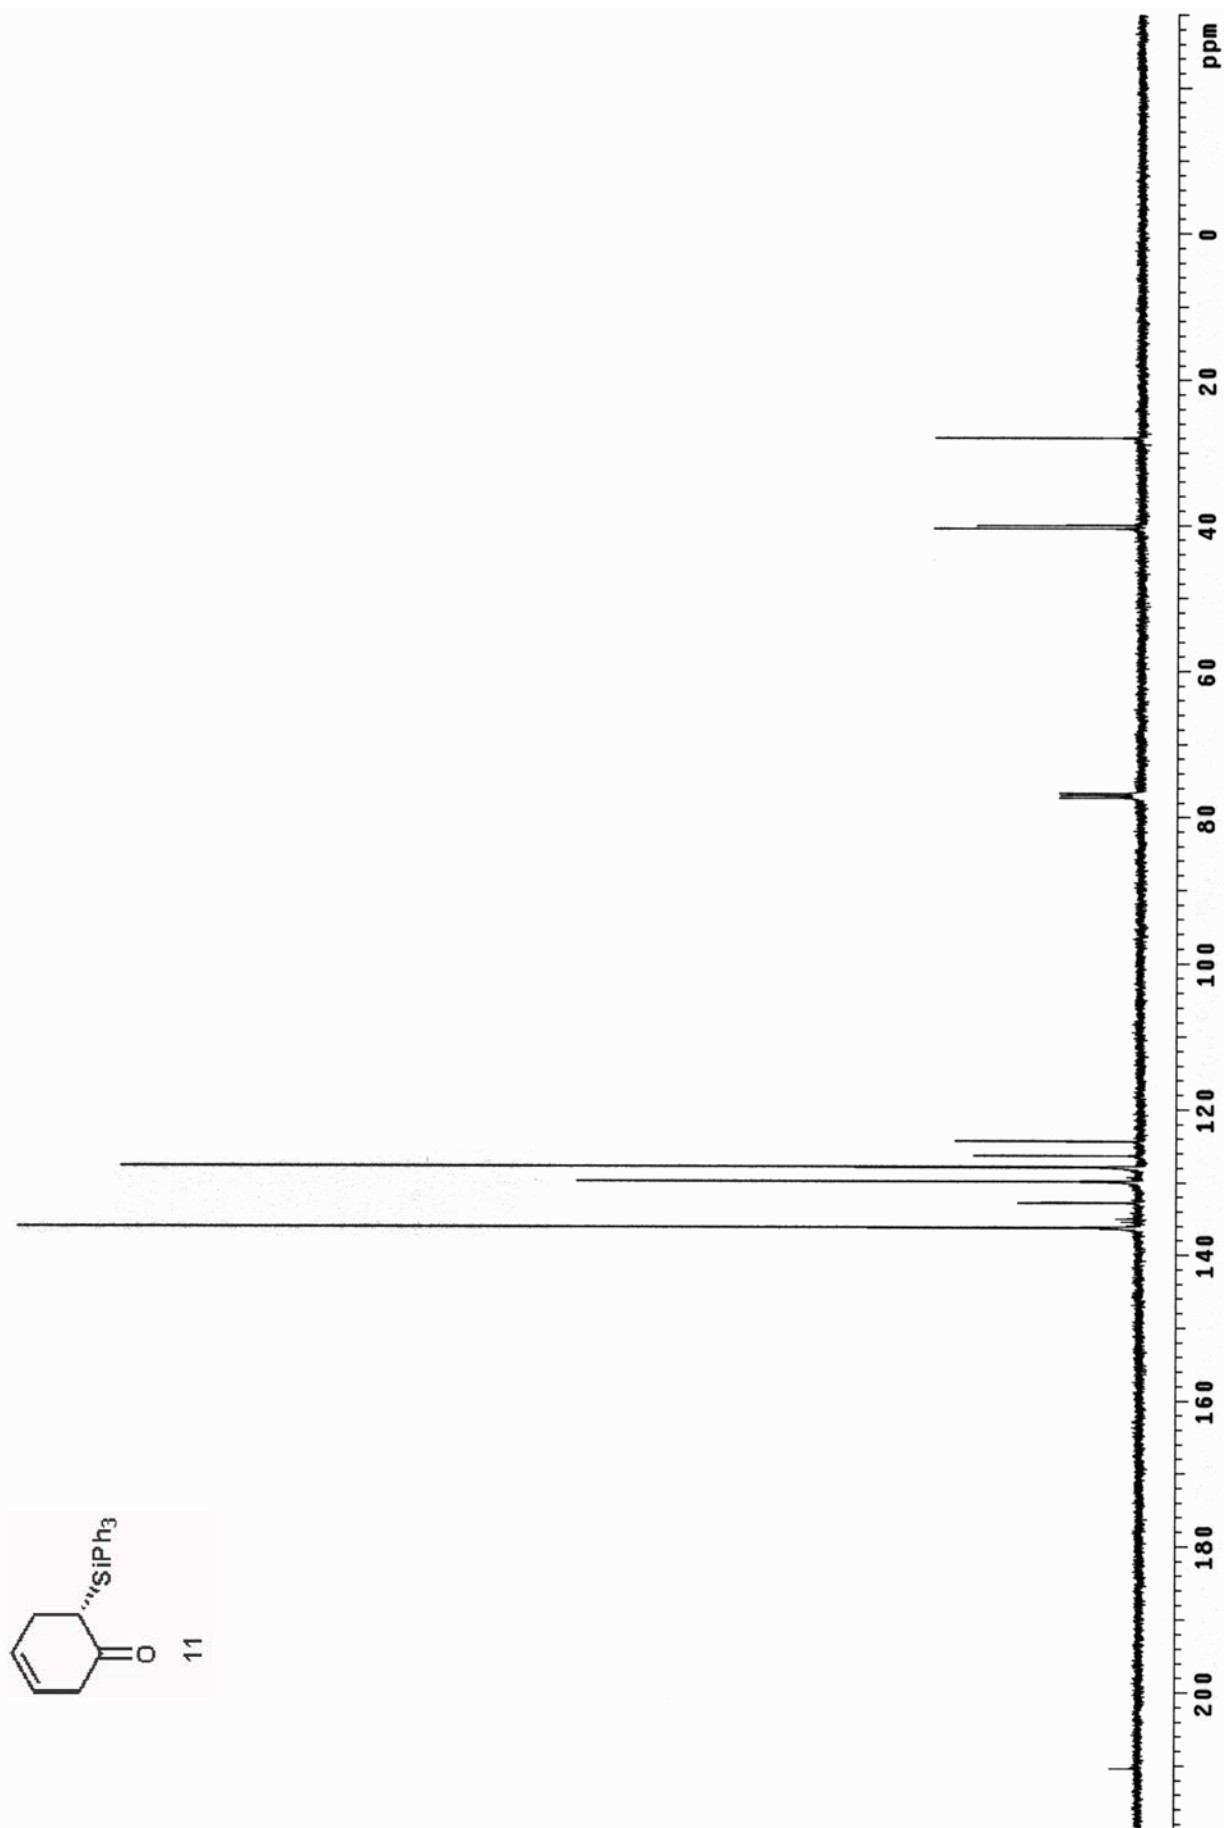

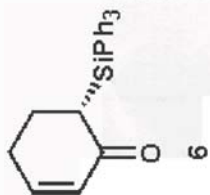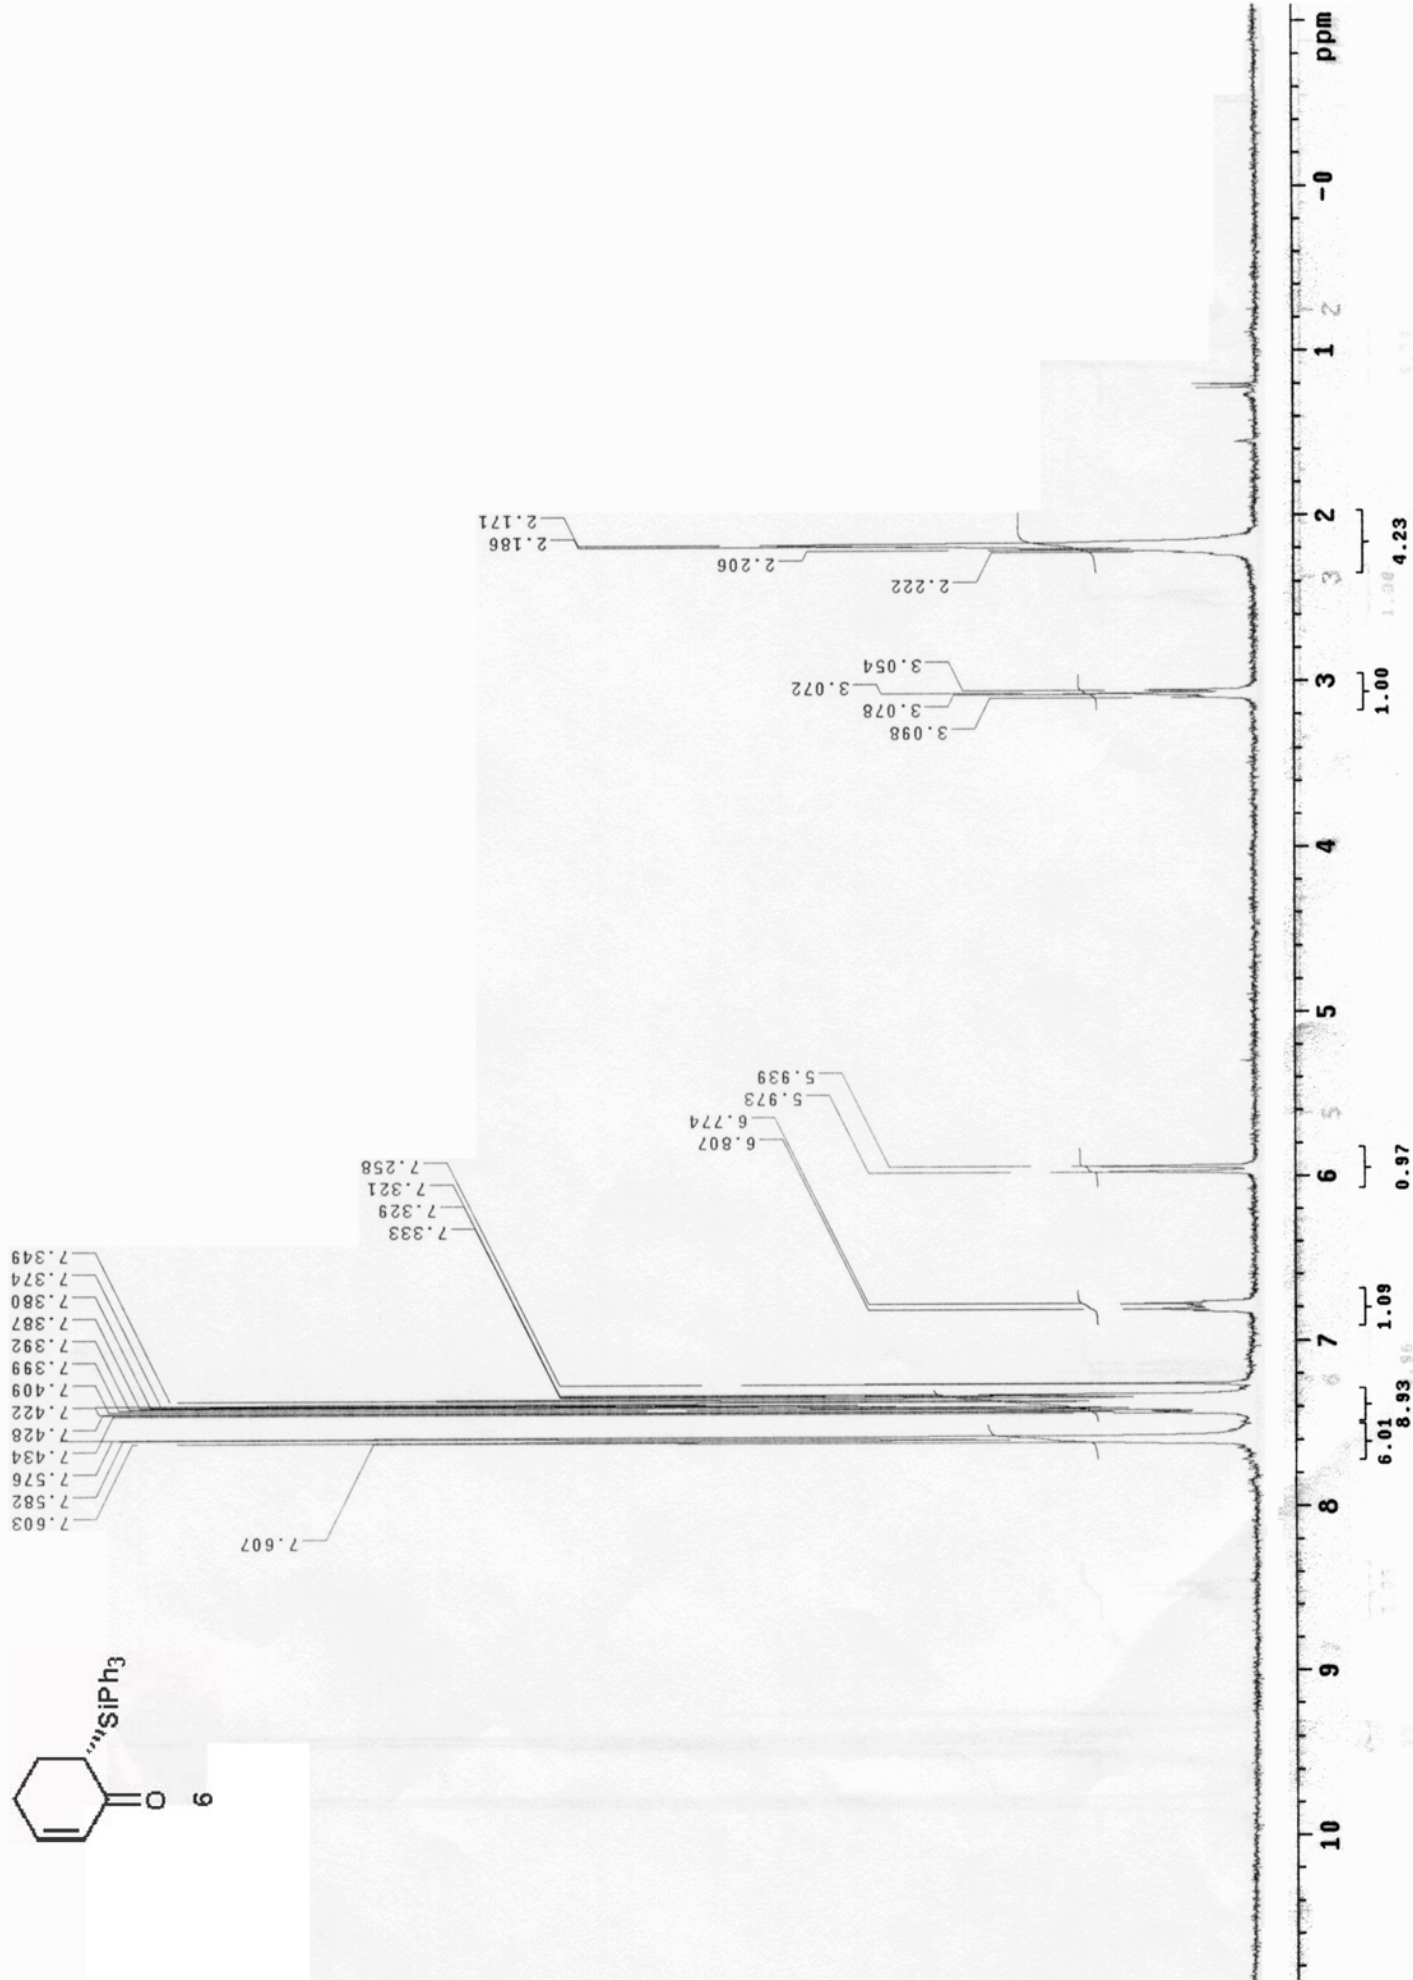



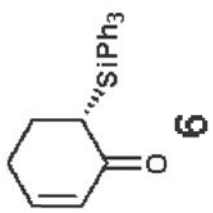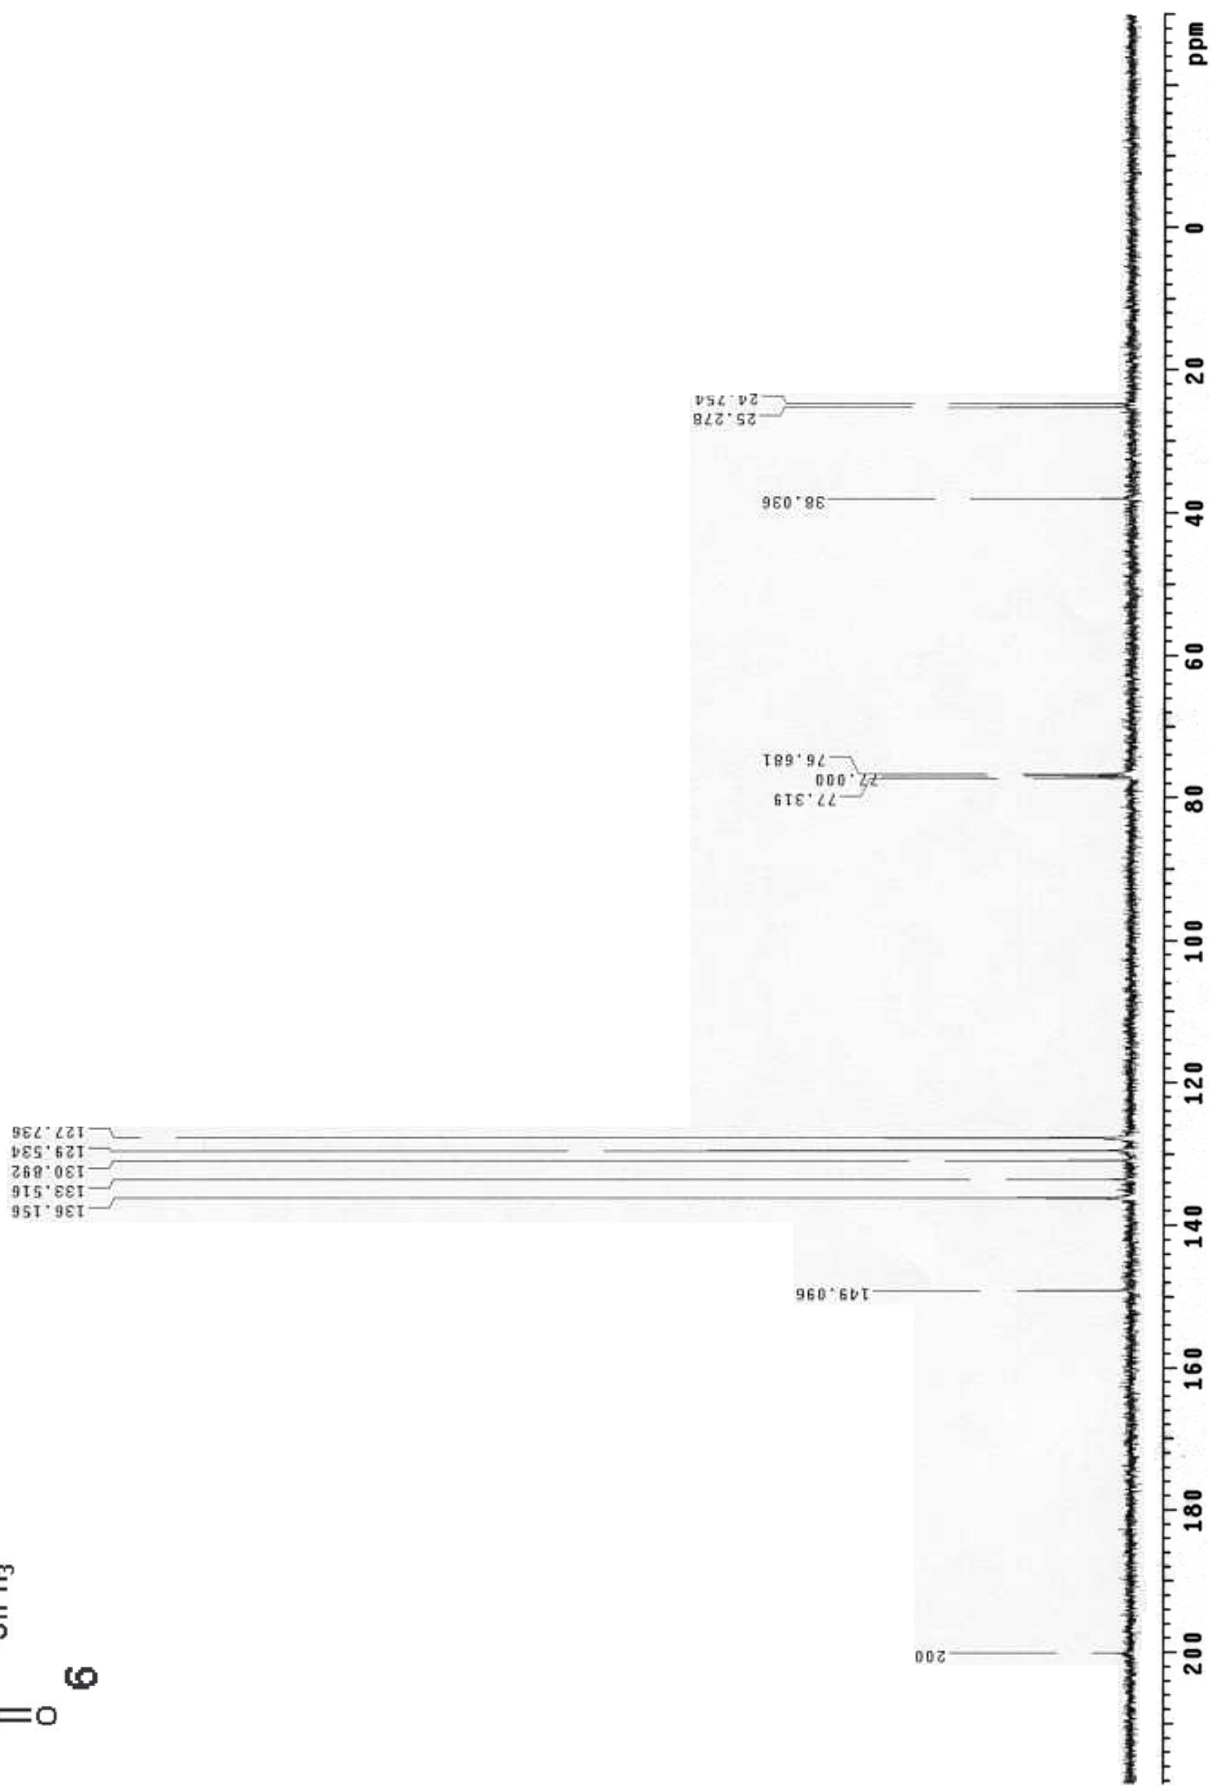

## STANDARD 1H OBSERVE

exp1 std1h

SAMPLE  
 date Jul 19 2006  
 solvent CDCl3  
 file ACQUISITION  
 sfrq 399.433  
 tn H1  
 at 2.731  
 np 32768  
 sw 5998.8  
 fb 3400  
 bs 4  
 ss 2  
 tpwr 59  
 pw 12.0  
 dl 0  
 tof 0  
 nt 128  
 ct 48  
 alock not used  
 gain n  
 flags n  
 il n  
 in n  
 dp y  
 sp -1031.8  
 wp 5998.8  
 vs 151  
 sc 0  
 wc 250  
 hzmm 13.44  
 is 500.00  
 rfl 1031.8  
 rfp 0  
 th 20  
 ins 1.000  
 nm ph

DEC. & VT  
 dfrq 399.433  
 dn H1  
 dpwr 43  
 dof 0  
 dm nm  
 dmm C  
 dmf 12200  
 temp 23.0  
 PROCESSING  
 lb 0.10  
 wfile  
 4  
 2  
 proc not used  
 fn ft  
 12.0  
 werr  
 0  
 wexp  
 128  
 wbs  
 48  
 wnt

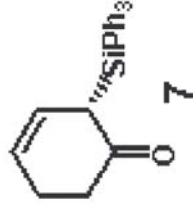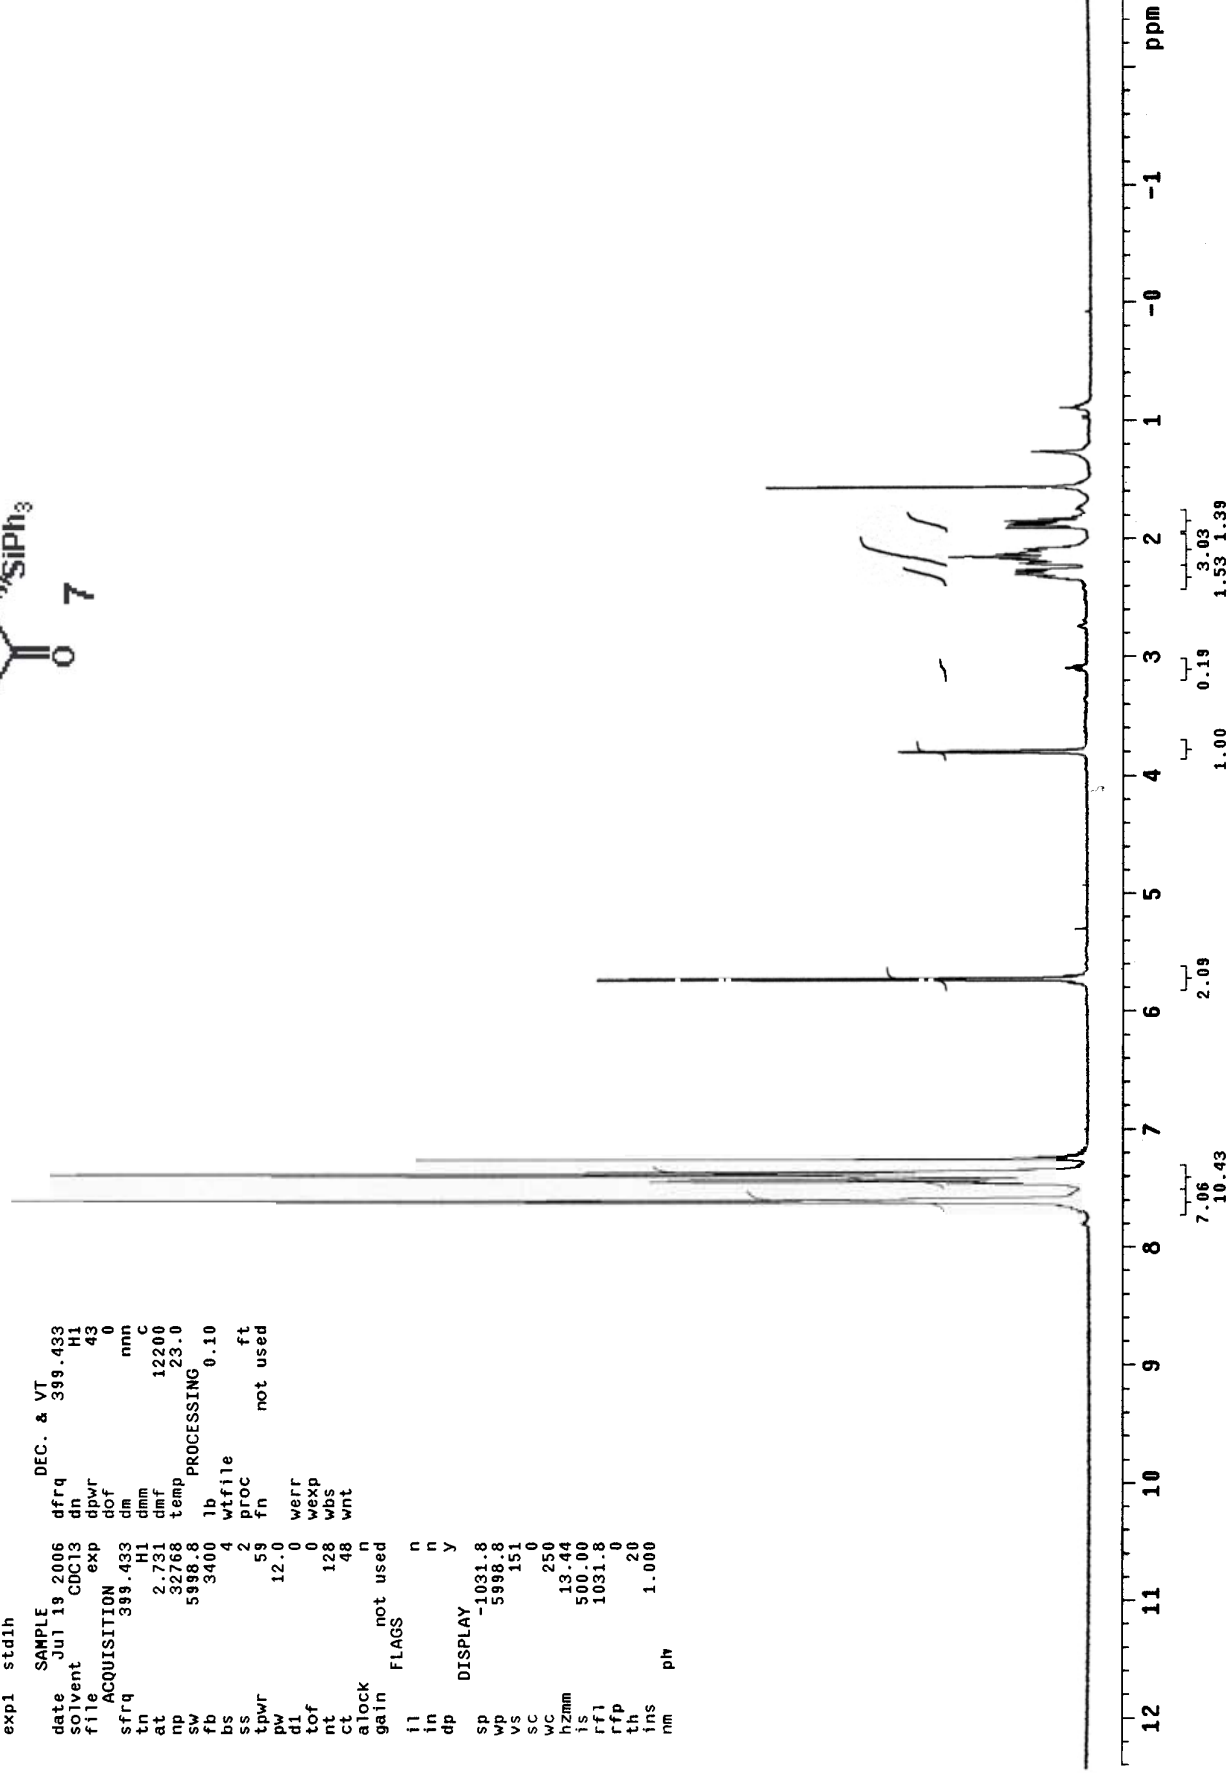

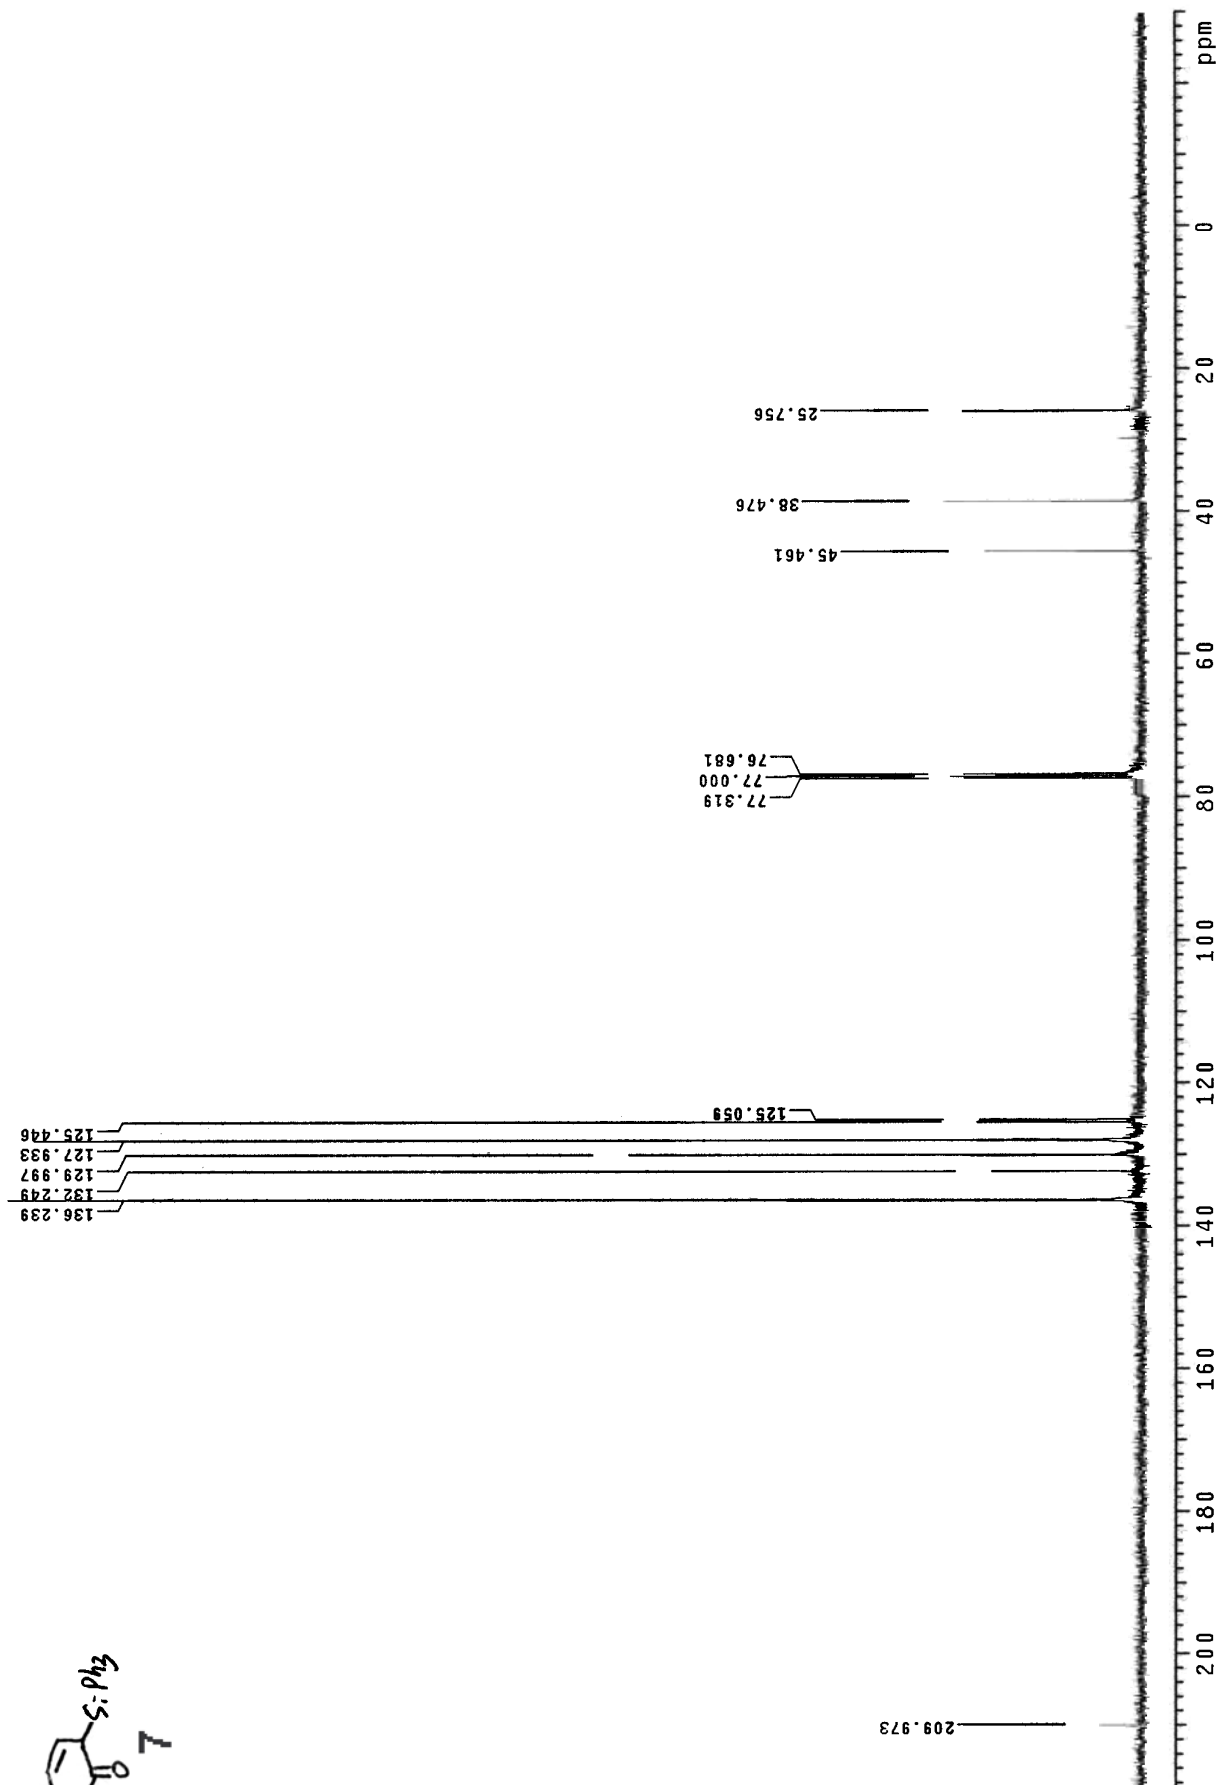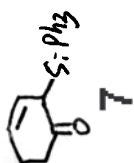

## exp6 s2pul

ph

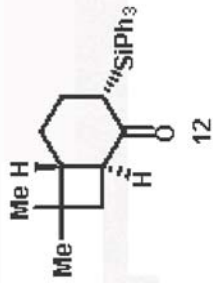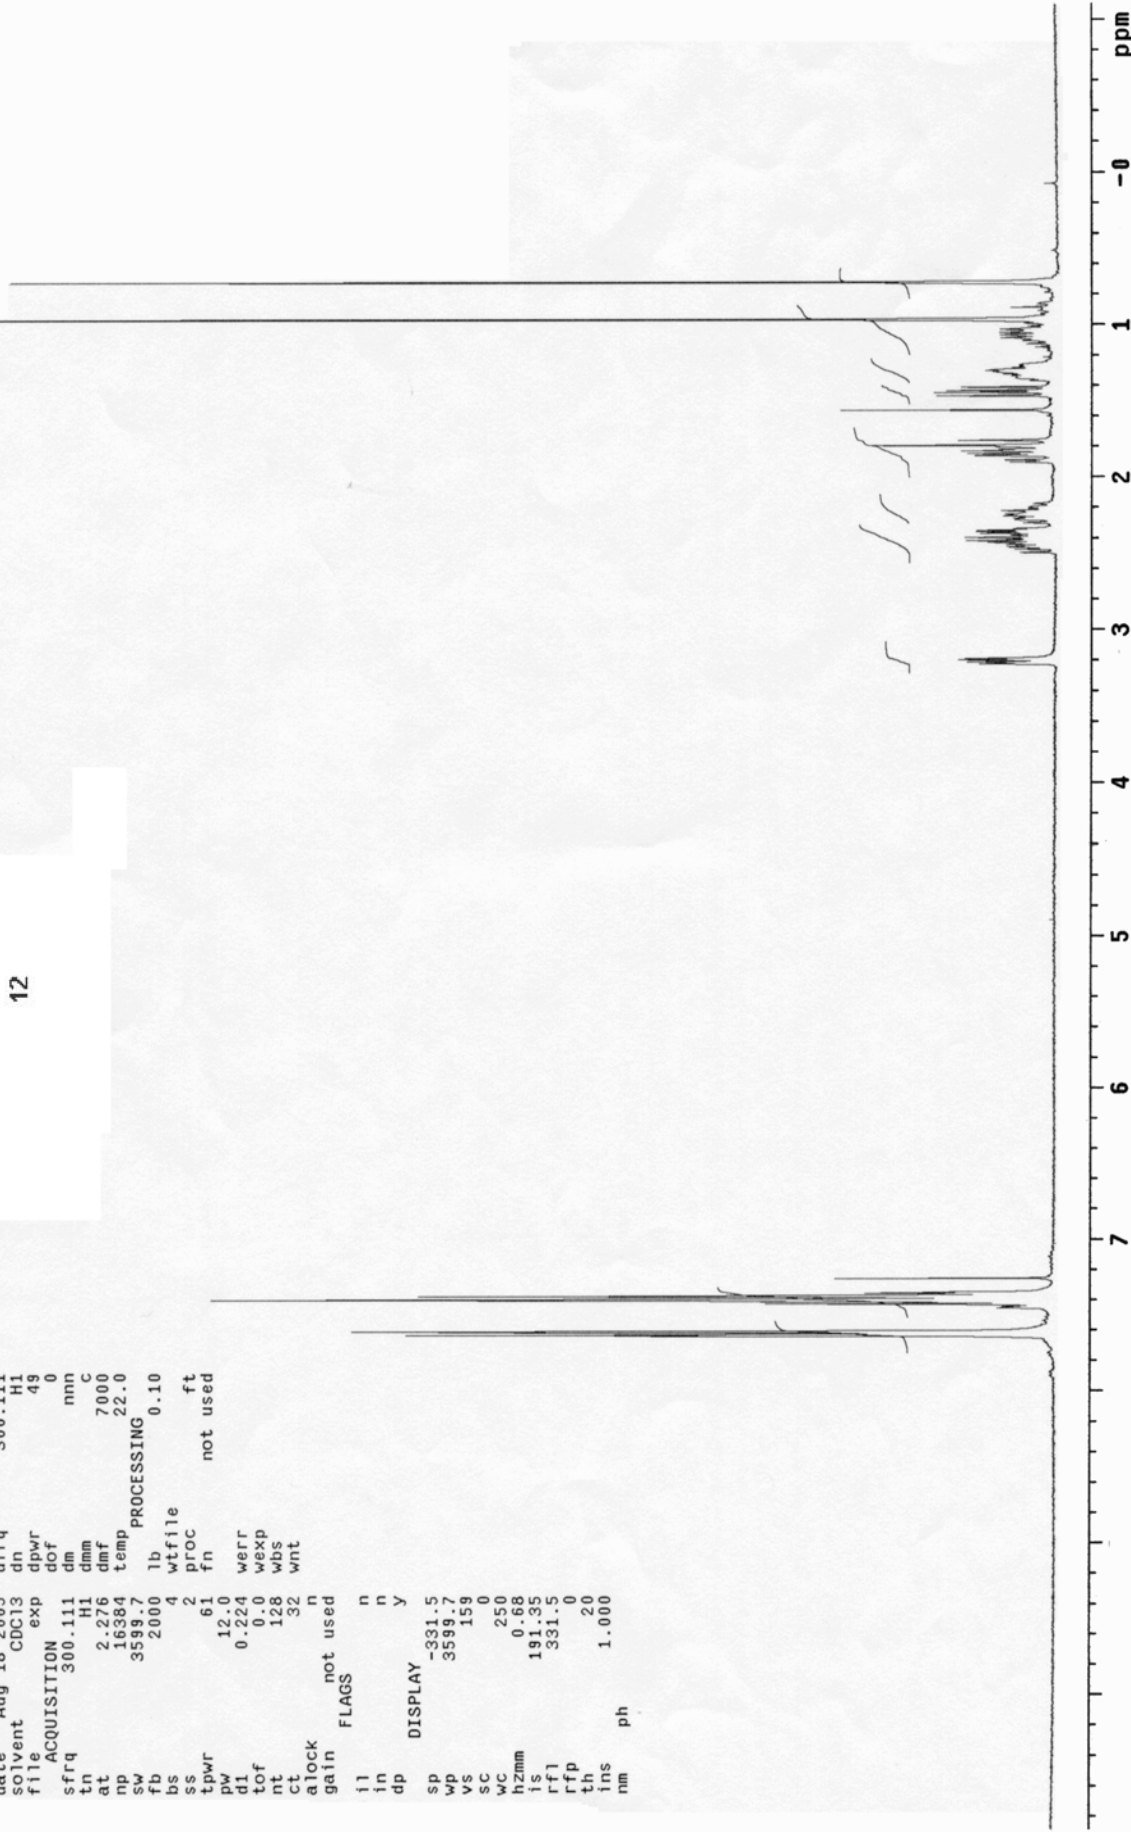

13C OBSERVE

exp3 std13c

|         |             |            |          |
|---------|-------------|------------|----------|
| date    | Jul 31 2006 | DEC. & VT  | 400.021  |
| solvent | CDCl3       | dn         | H1       |
| file    | ACQUISITION | dpwr       | 46       |
| exp     | exp         | dof        | 0        |
| sfreq   | 100.594     | dm         | yyy      |
| tn      | C13         | dmm        | w        |
| at      | 1.311       | dmf        | 9993     |
| np      | 65536       | temp       | 22.0     |
| sw      | 25000.0     | PROCESSING |          |
| fb      | 13800       | lb         | 1.00     |
| bs      | 8           | wtfile     |          |
| tpwr    | 61          | proc       | ft       |
| d1      | 3.2         | fn         | not used |
| tof     | 0           | werr       |          |
| nt      | 10000       | wexp       | svf(n1)  |
| ct      | 56          | wbs        |          |
| alock   | n           | wnt        |          |
| gain    | not used    |            |          |
| il      | n           |            |          |
| in      | n           |            |          |
| dp      | y           |            |          |
| sp      | -3019.3     | DISPLAY    |          |
| wp      | 24999.2     |            |          |
| vs      | 158         |            |          |
| sc      | 0           |            |          |
| wc      | 250         |            |          |
| hzm     | 26.26       |            |          |
| is      | 500.00      |            |          |
| rfl     | 3020.0      |            |          |
| rfl     | 0           |            |          |
| th      | 5           |            |          |
| ins     | 100.000     |            |          |
| nm      | ph          |            |          |

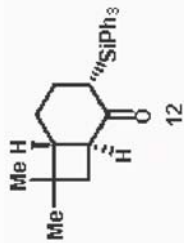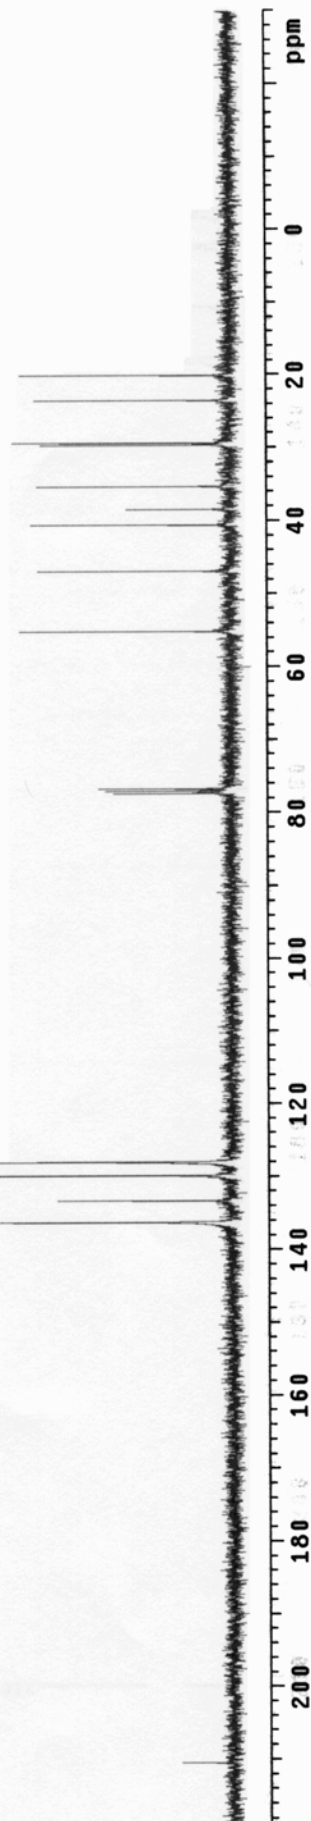

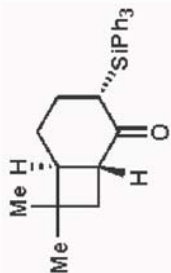

13

# STANDARD 1H OBSERVE

```

exp5 stdih
SAMPLE
date Jul 28 2006
solvent CDC13
file exp
ACQUISITION
sfrq 399.433
tn H1
at 2.731
np 32768
sw 5998.8
fb 3400
bs 4
ss 2
tpwr 59
pw 12.0
d1 0
nt 128
ct 28
alock not used
gain not used
il n
in n
dp y
DISPLAY
sp -1031.8
wp 5998.8
vs 130
sc 0
wc 250
hzm 0.45
is 500.00
rfl 1031.8
rfp 0
th 20
ins 1.000
nm ph
  
```

```

DEC. & VT
dfrq 399.433
dn H1
dpr 43
dof 0
dm nnn
dmm C
dmf 12200
temp 23.0
PROCESSING
lb 0.10
wtfile
2 proc
fn not used
werr 0
wexp 0
wbs 28
wnt 28
  
```

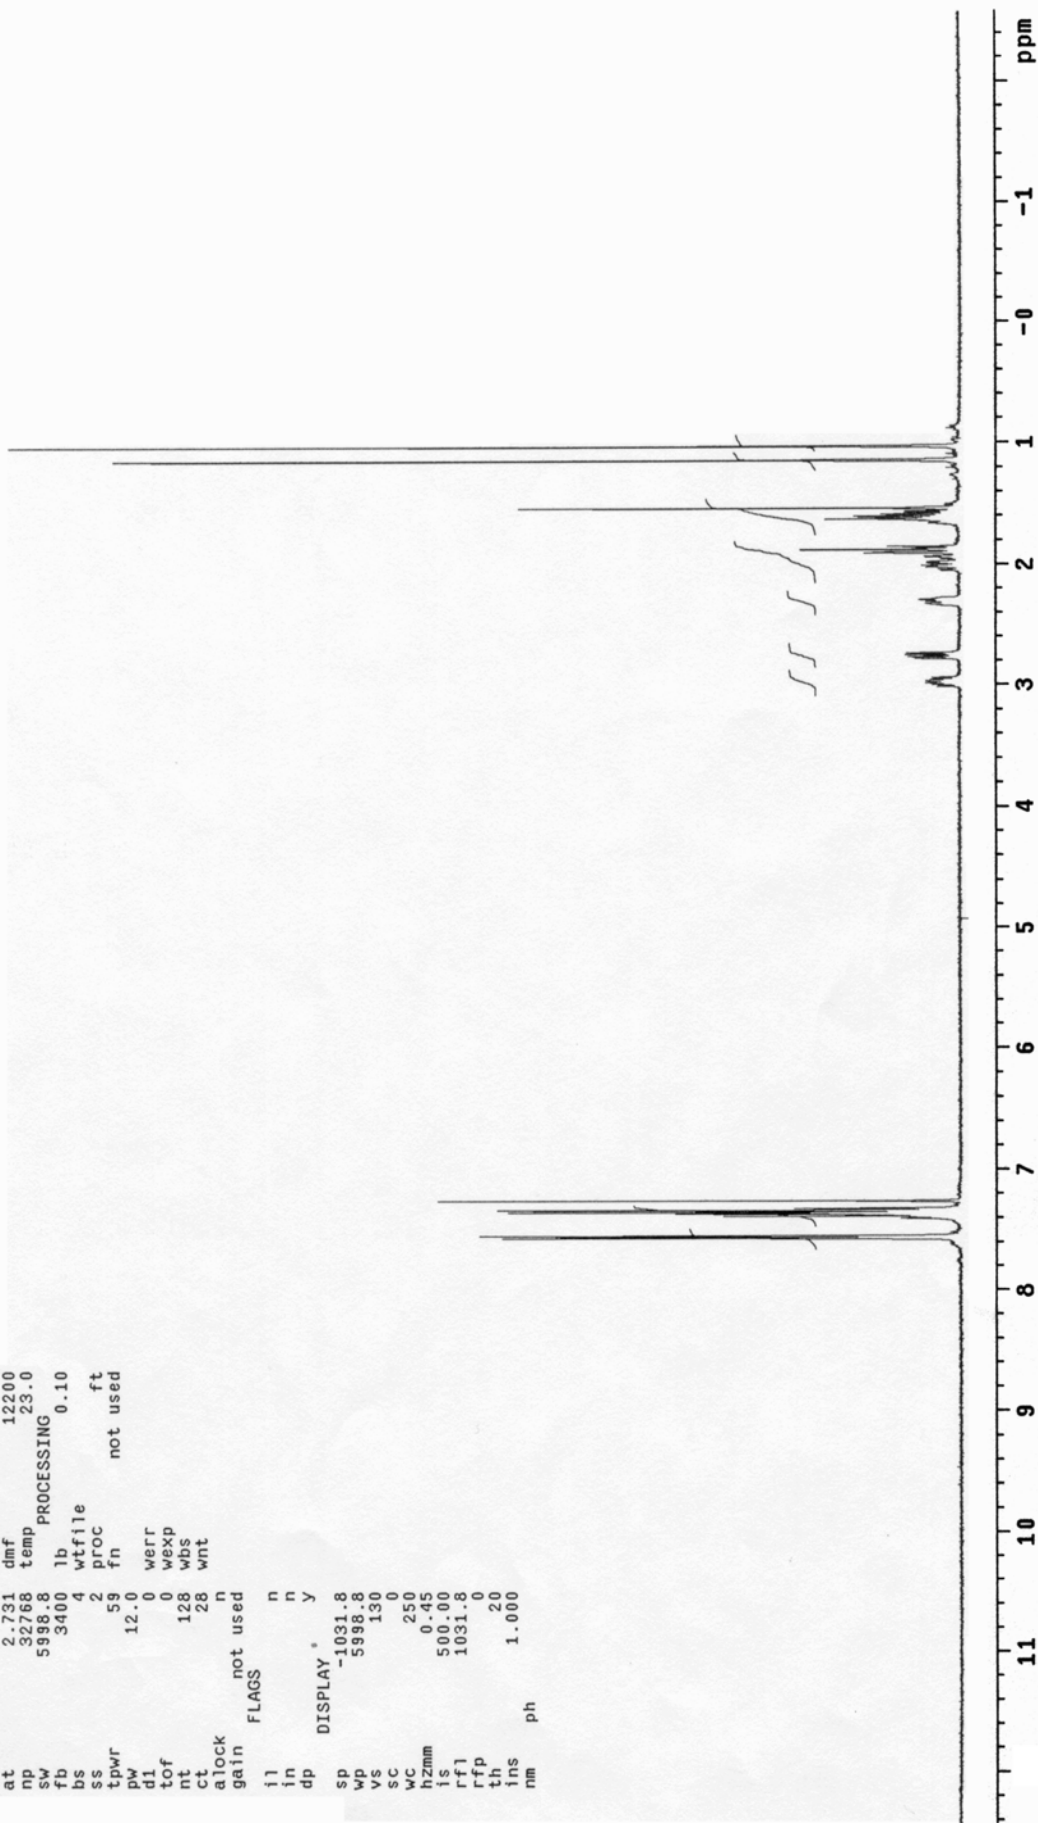



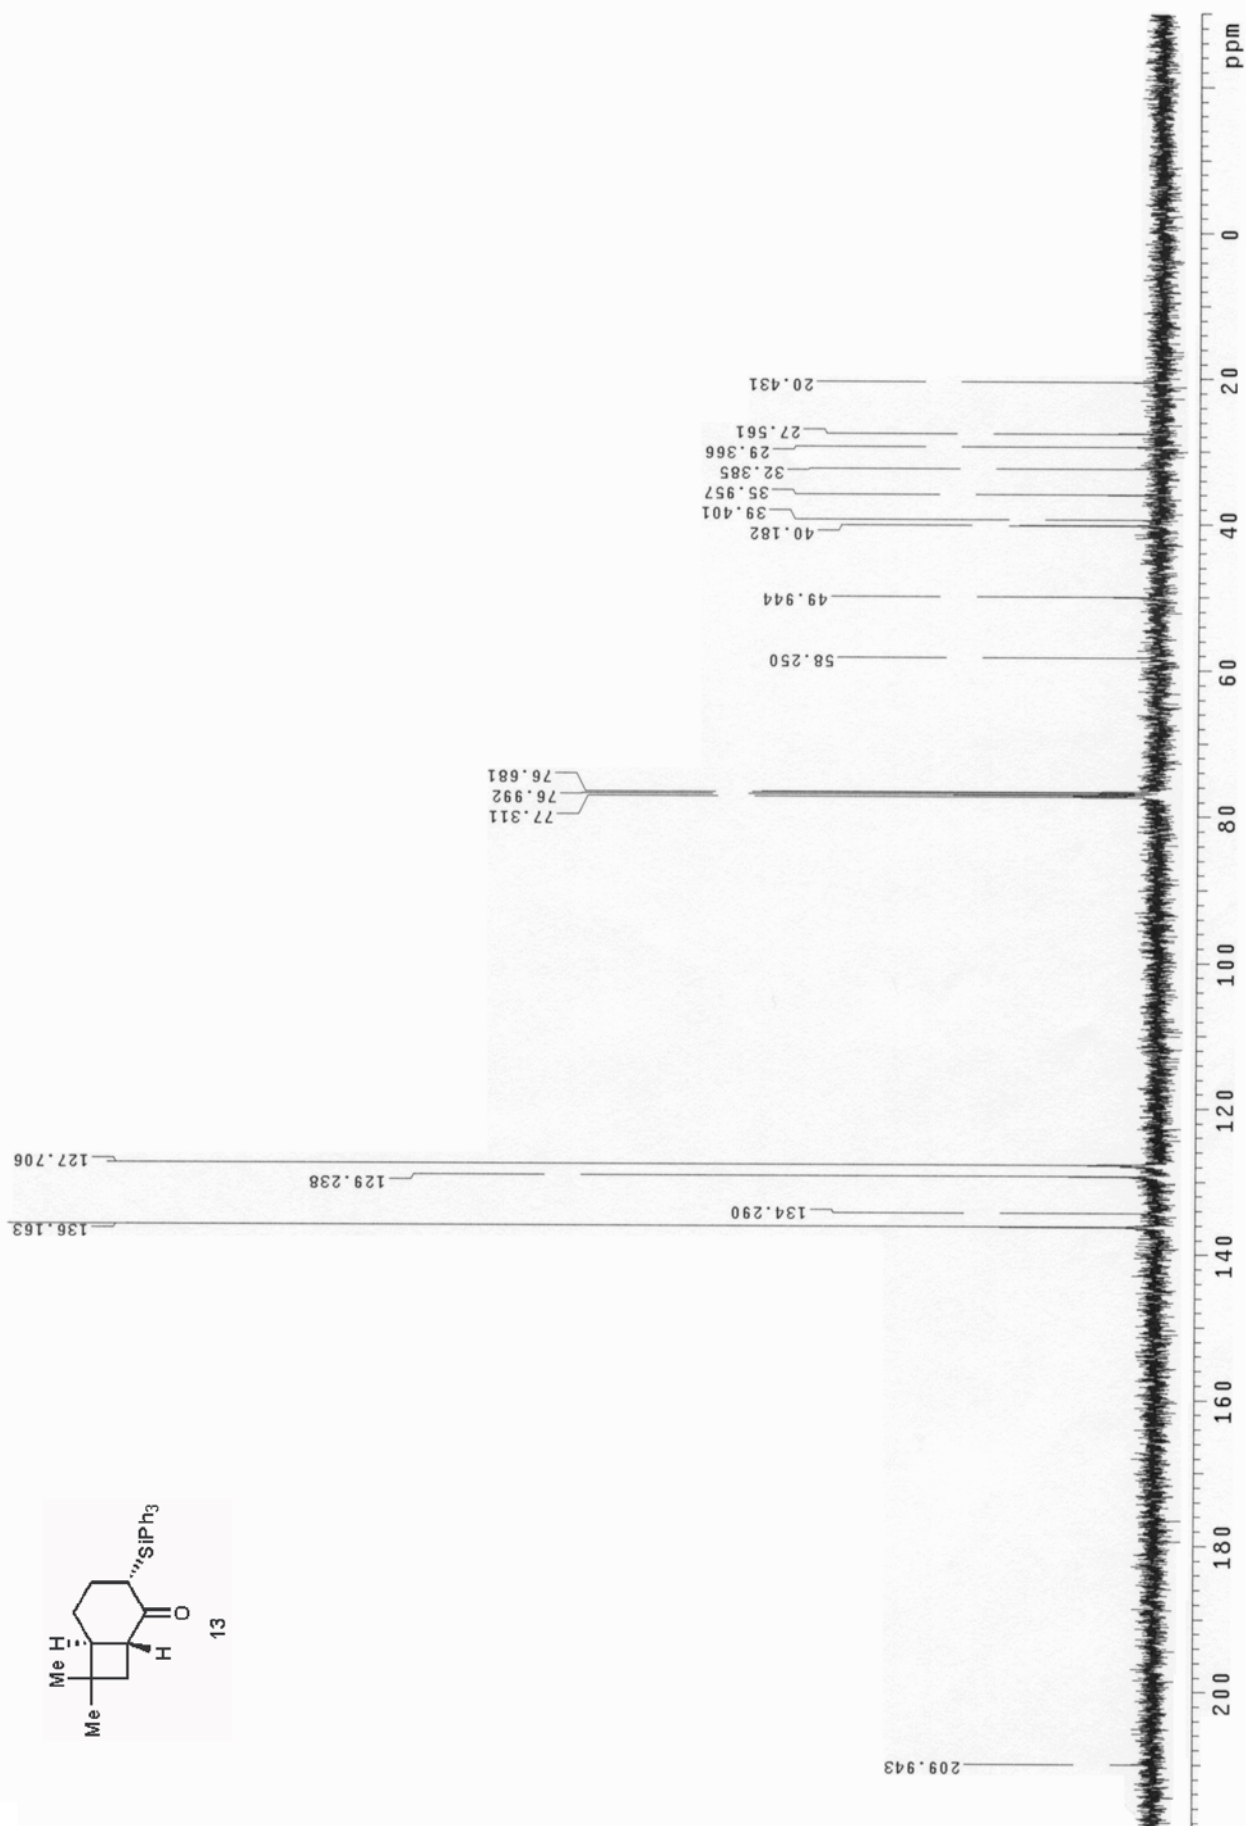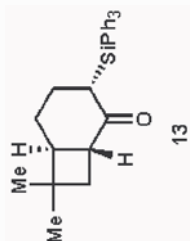

exp1 std1h

|             |            |            |          |
|-------------|------------|------------|----------|
| SAMPLE      |            | DEC. & VT  |          |
| date        | Aug 7 2006 | dfrq       | 400.021  |
| solute      | CDC13      | dn         | H1       |
| file        | exp        | dpwr       | 40       |
| ACQUISITION |            | dof        | 0        |
| sfrq        | 400.021    | dm         | nnn      |
| tn          | H1         | dmm        | C        |
| at          | 2.731      | dmf        | 7500     |
| np          | 32748      | temp       | 22.0     |
| sw          | 5995.2     | PROCESSING |          |
| fb          | 3400       | lb         | 0.10     |
| bs          | 8          | wtfile     |          |
| ss          | 2          | proc       | not used |
| tpwr        | 60         | fn         | ft       |
| pw          | 15.0       | werr       |          |
| d1          | 0.120      | wexp       | svf(n1)  |
| tof         | 0          | wbs        |          |
| nt          | 256        | wnt        |          |
| ct          | 16         |            |          |
| alock       | not used   |            |          |
| gain        | n          |            |          |
| fl          | n          |            |          |
| in          | n          |            |          |
| dp          | y          |            |          |
| DISPLAY     |            |            |          |
| sp          | -1041.9    |            |          |
| wp          | 5994.8     |            |          |
| vs          | 138        |            |          |
| sc          | 0          |            |          |
| wc          | 250        |            |          |
| hzm         | 19.56      |            |          |
| is          | 124.01     |            |          |
| rfl         | 3846.4     |            |          |
| rff         | 2304.1     |            |          |
| th          | 20         |            |          |
| ins         | 2.000      |            |          |
| nm          | cdc        | ph         |          |

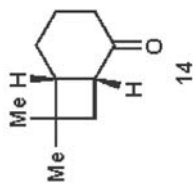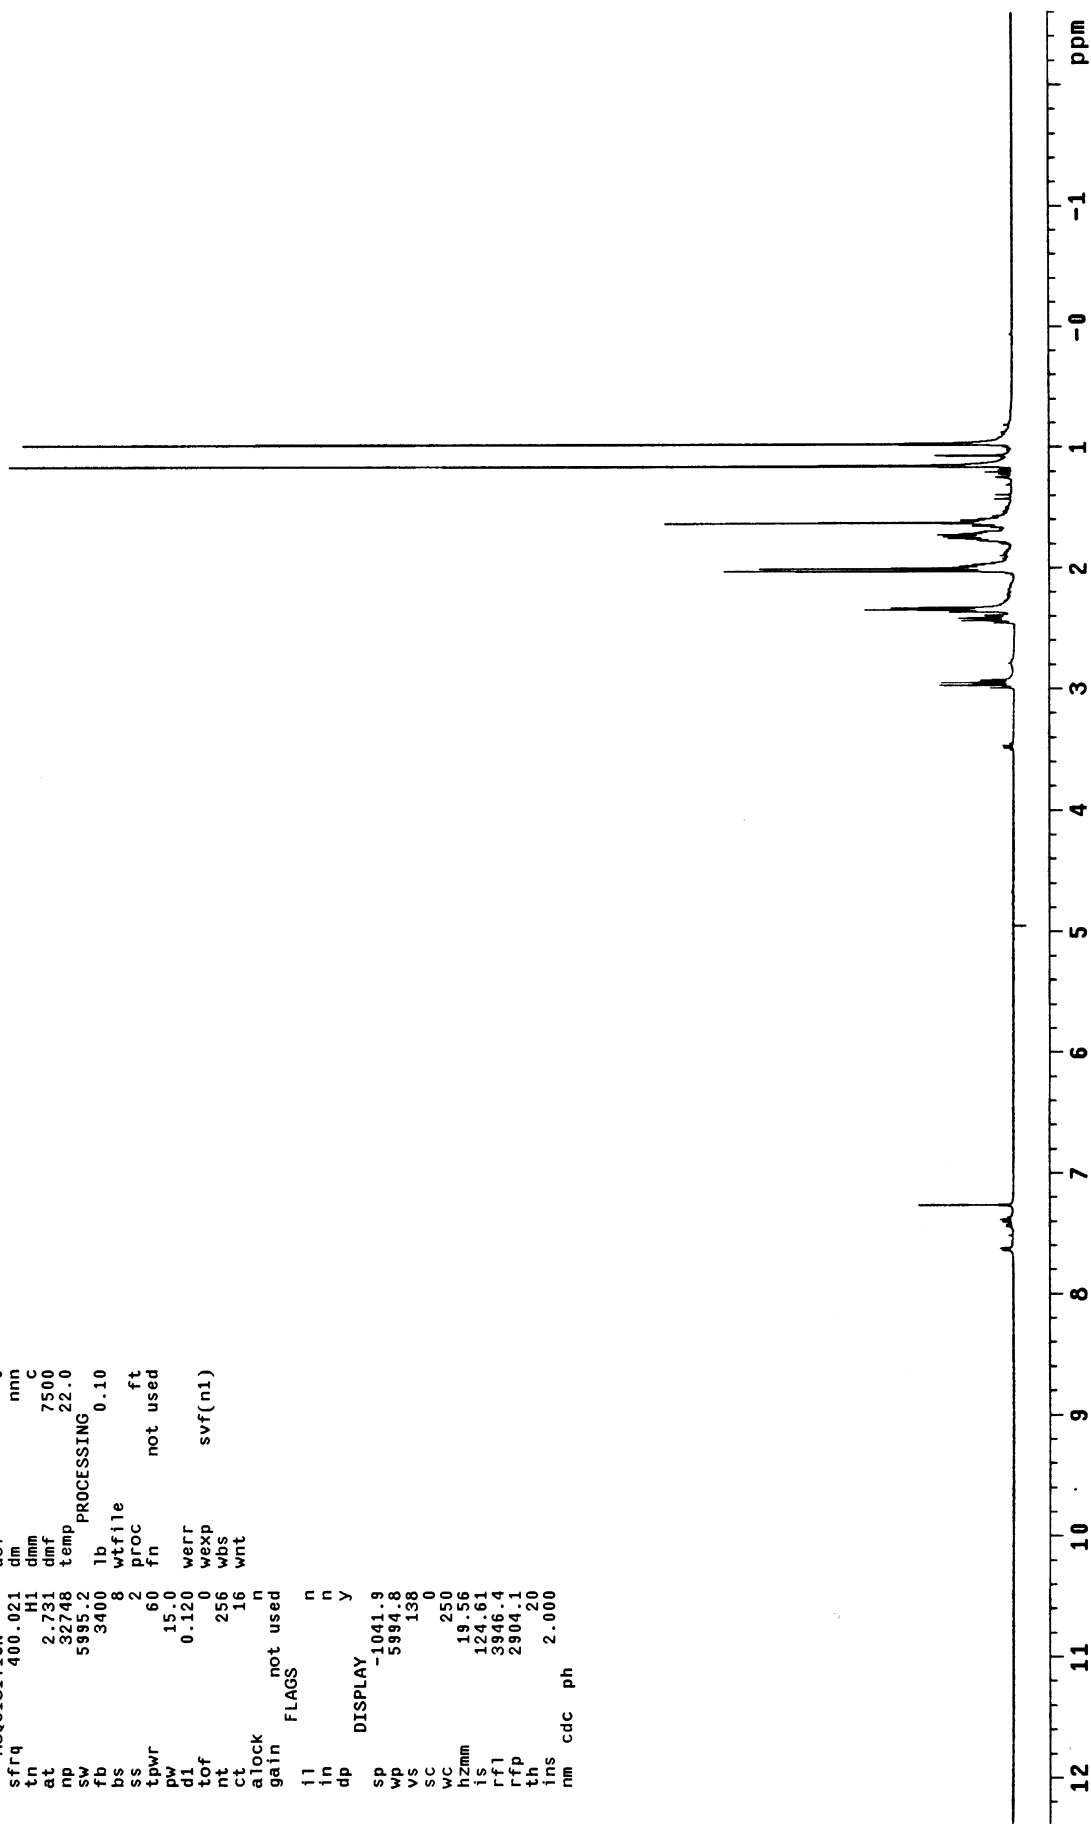

Supplement: Supplementary file 1 [file 4720402]
